# Supplementary material
Source: PubMed Central journal article supplement (PMC3179852)

## Supporting Information-2

# A Convergent Synthesis of the Proposed Structure of Antitumor Depsipeptide, Stereocalpin A

Arun K. Ghosh\* and Chun-Xiao Xu

*Departments of Chemistry and Medicinal Chemistry, Purdue University,  
West Lafayette, IN 47907*

## Contents

NMR spectra for the synthetic intermediate and final compounds

NMR for **7** to **14**.....S-26 to S-38

NMR for **16** to **20**.....S-39 to S-47

NMR for **1** .....S-48 to S-52

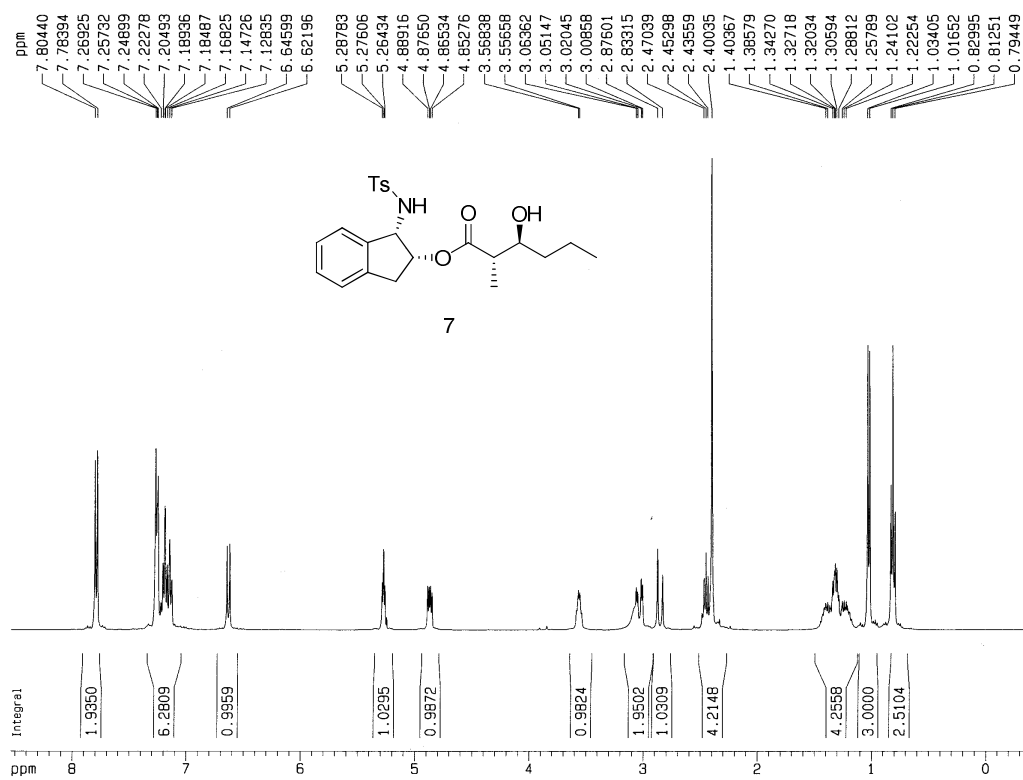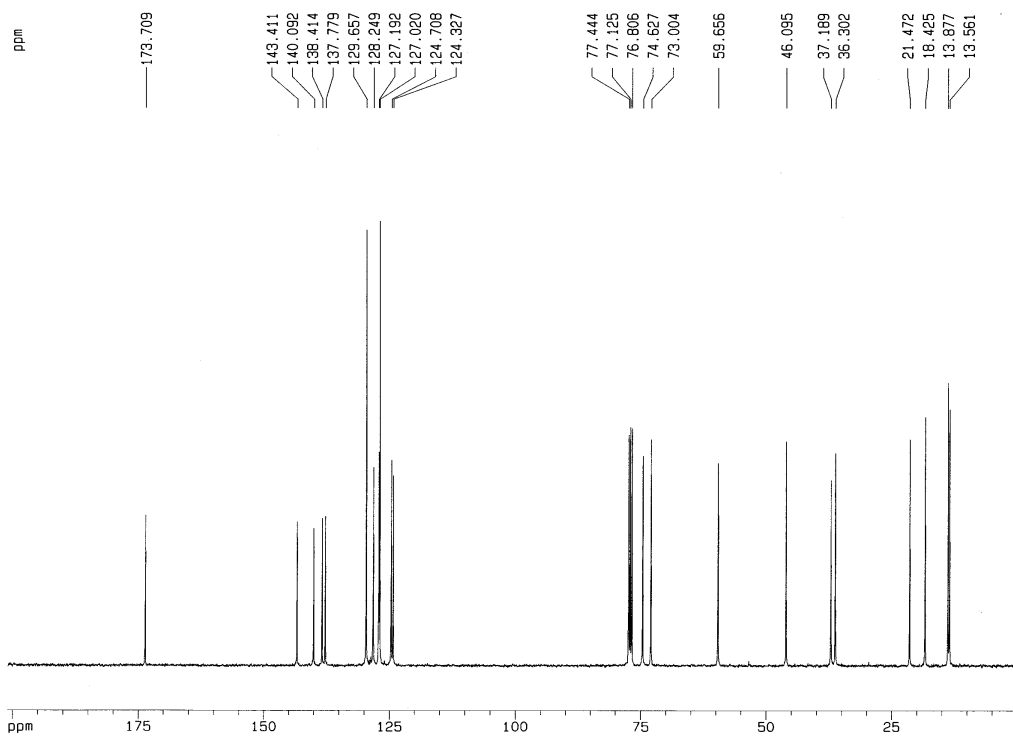

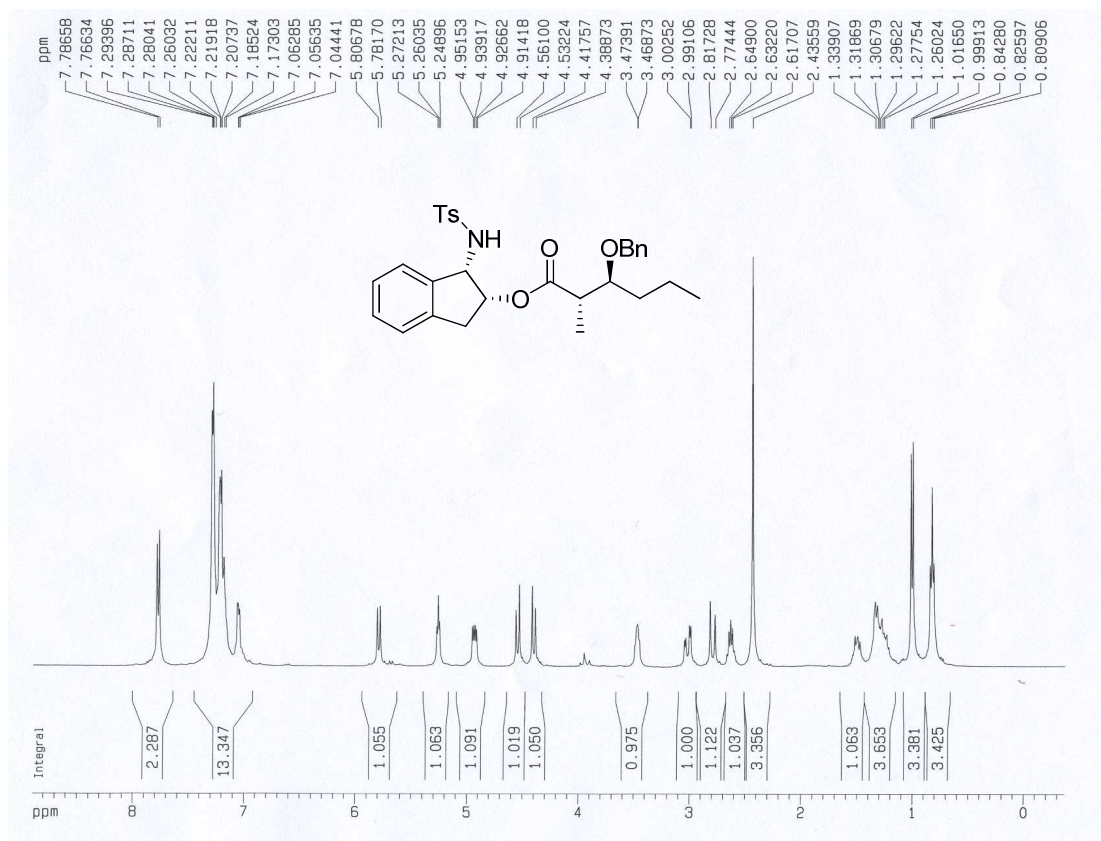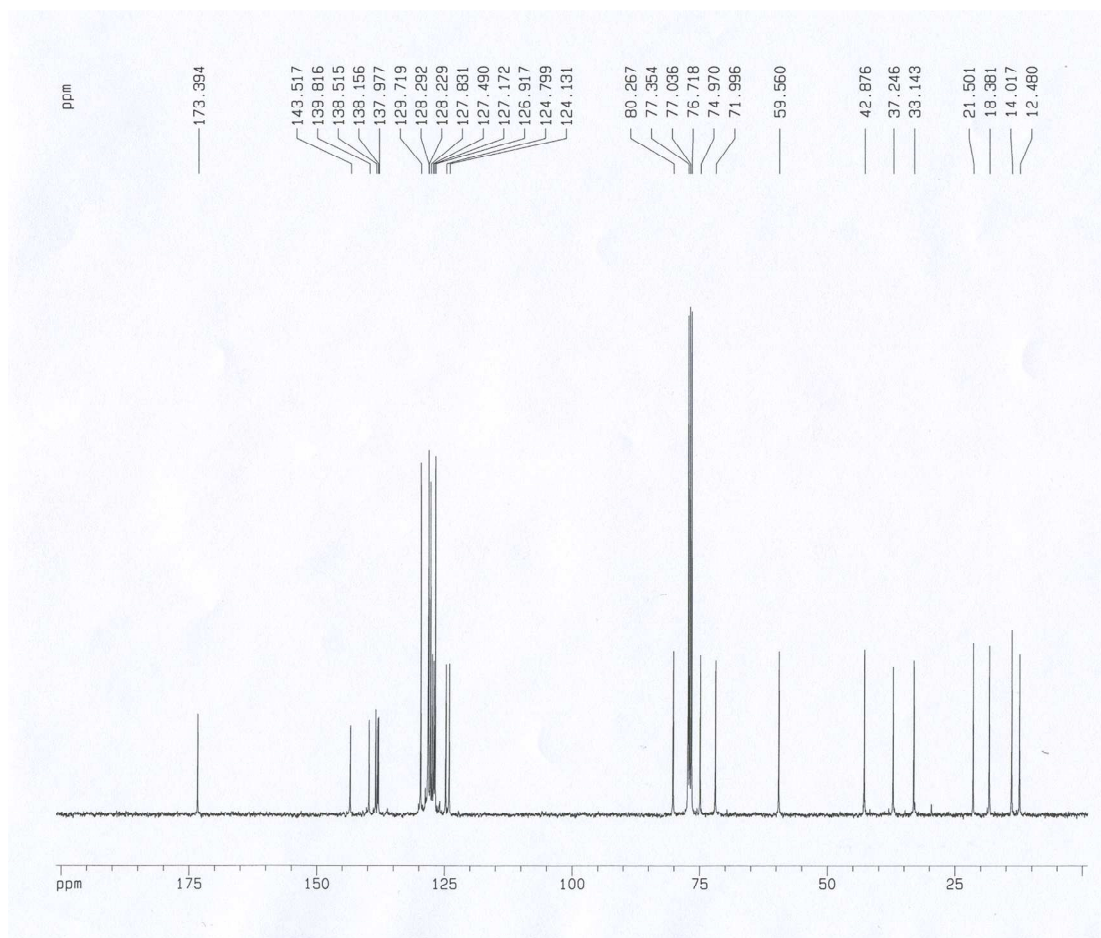

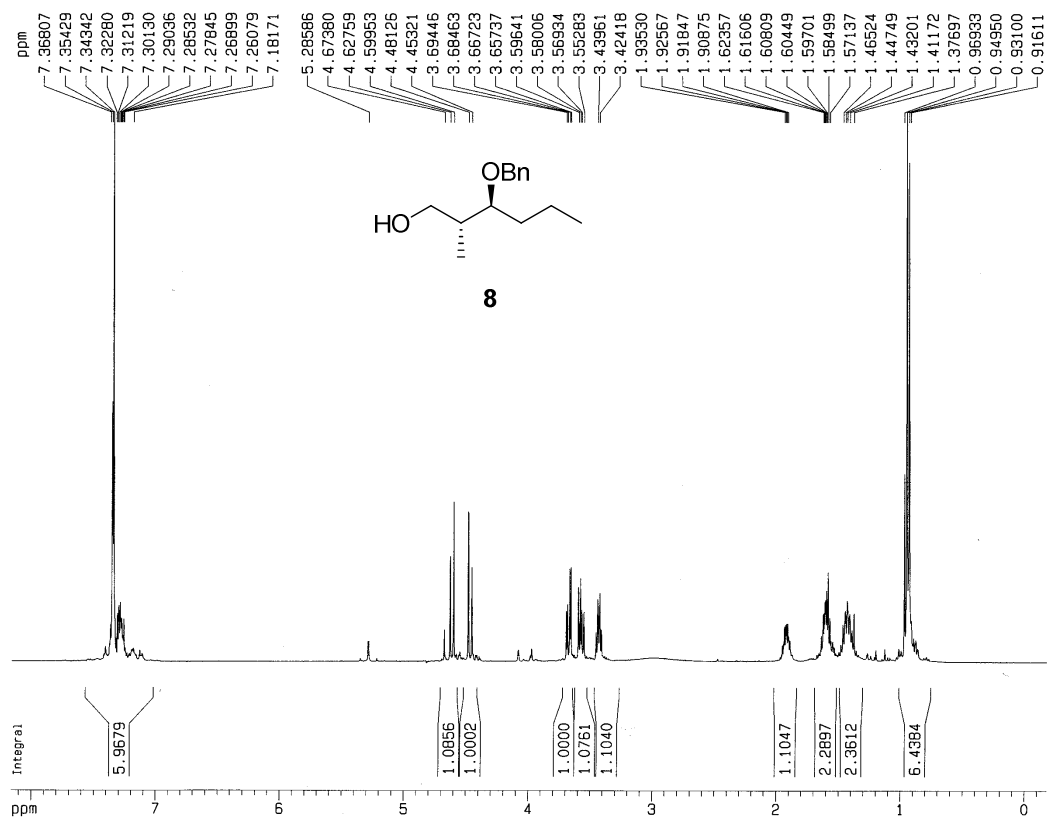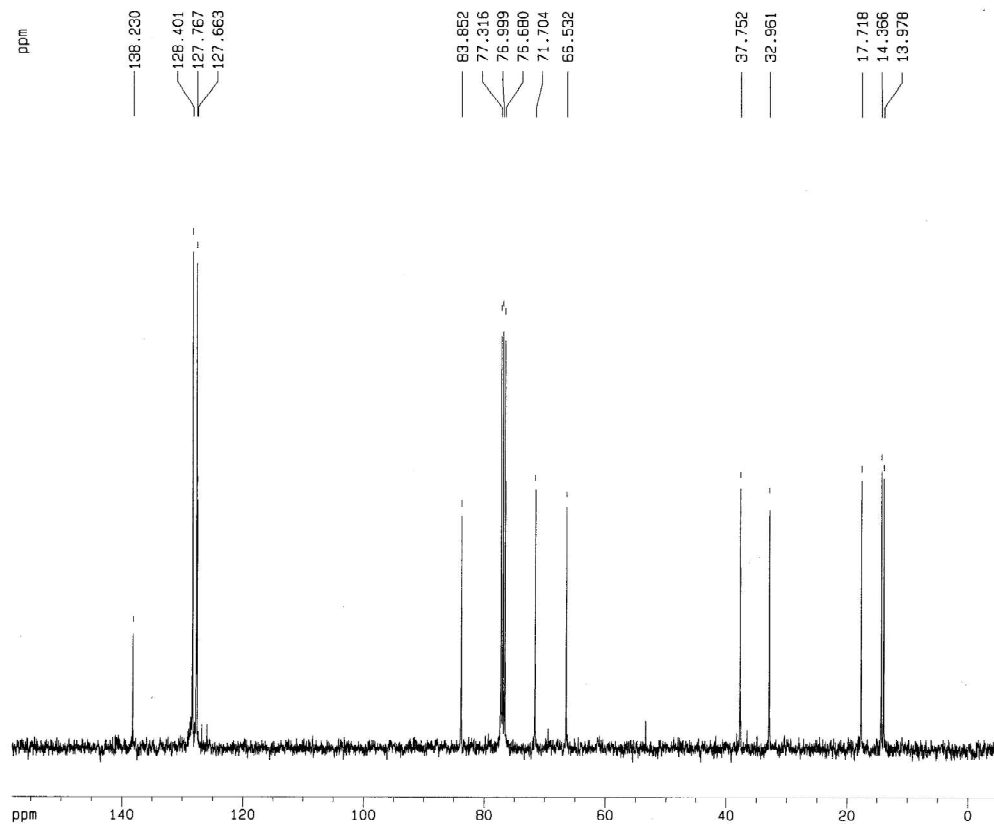

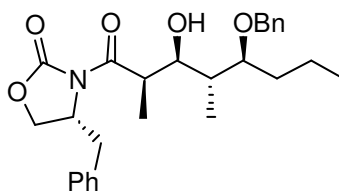

10

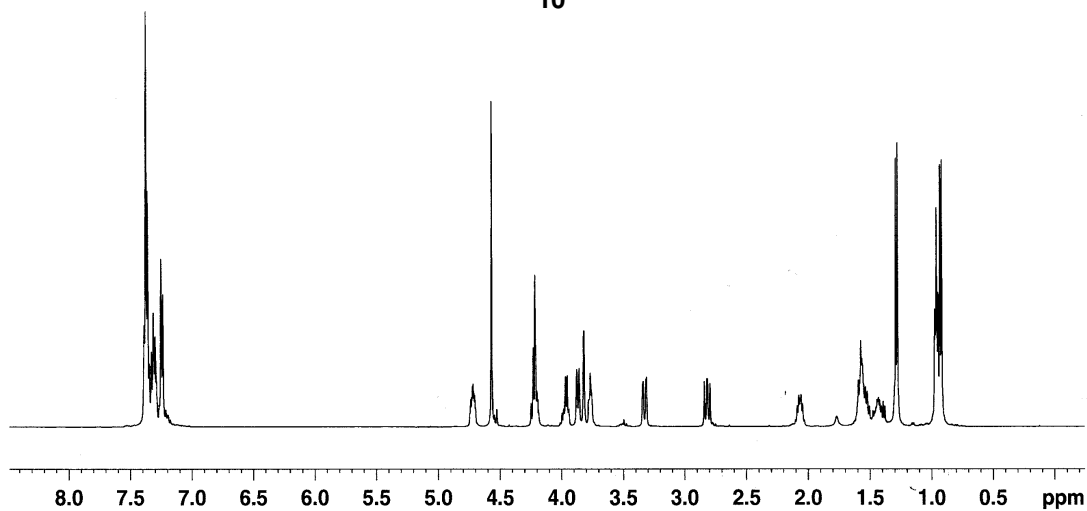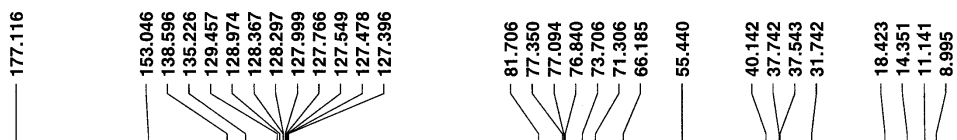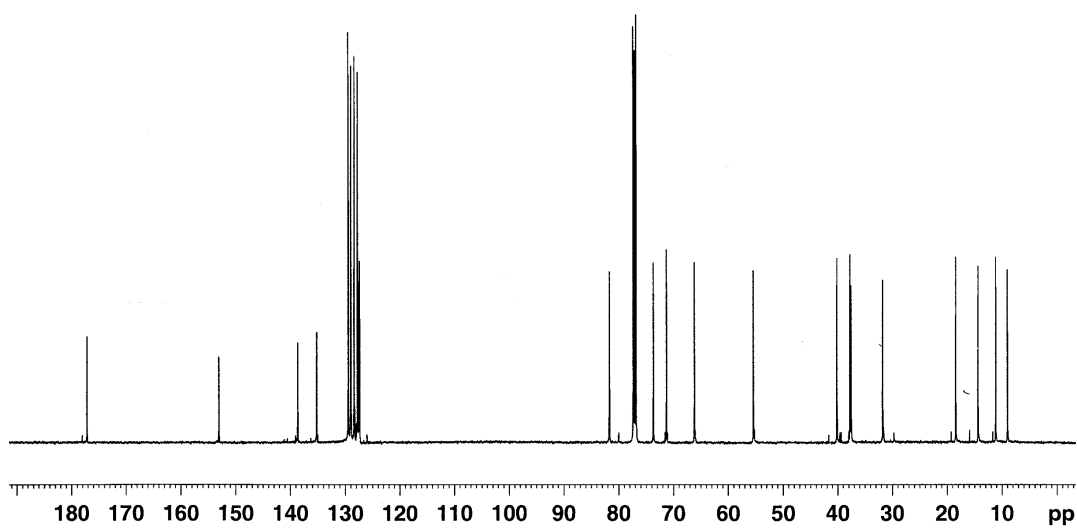

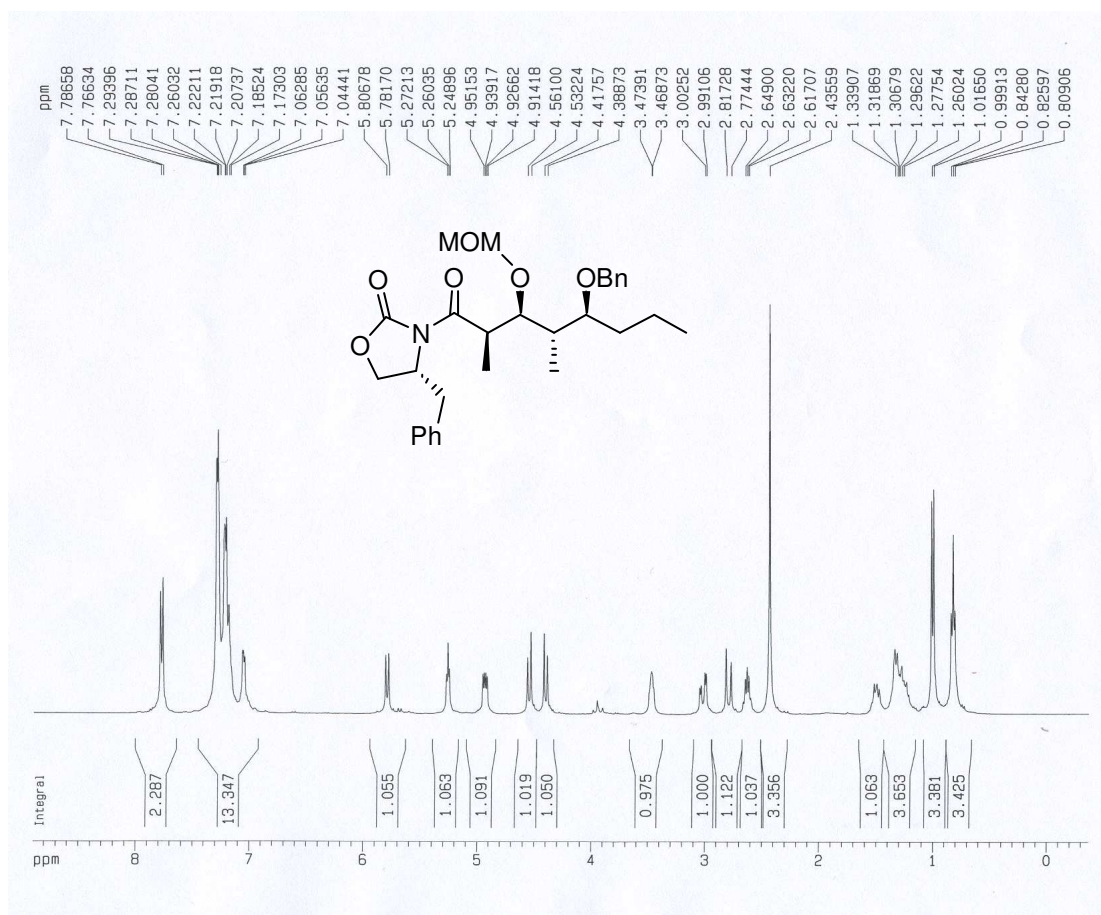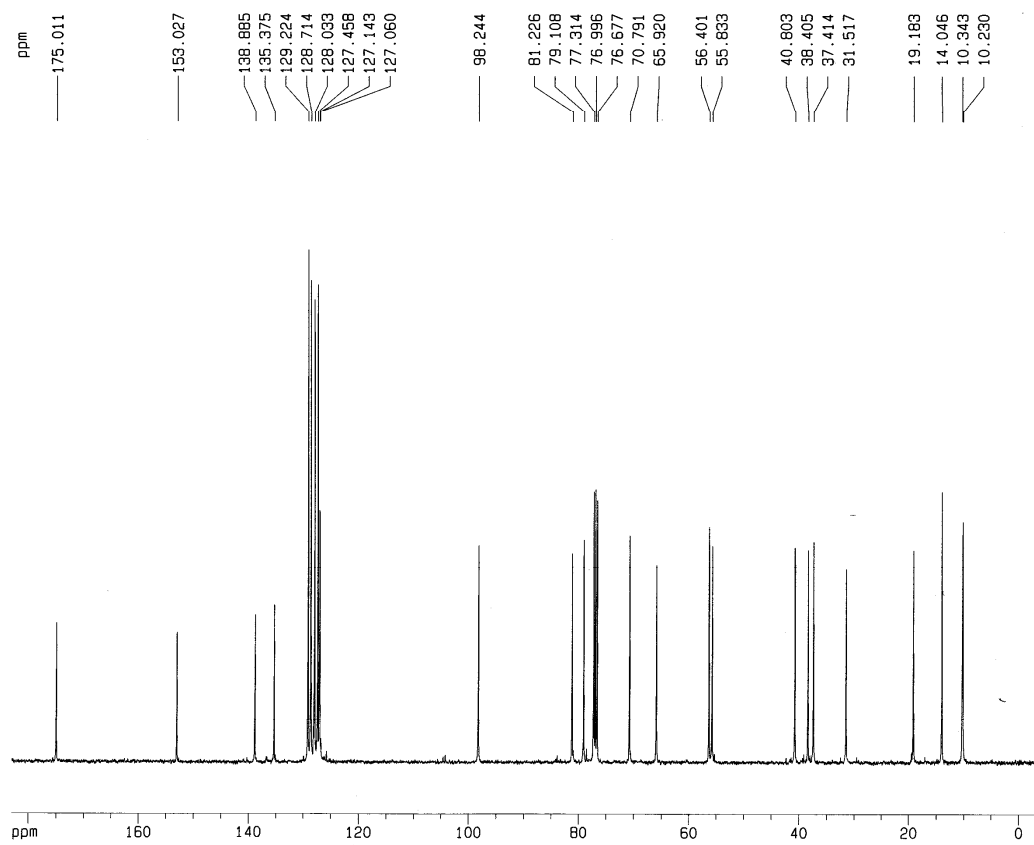

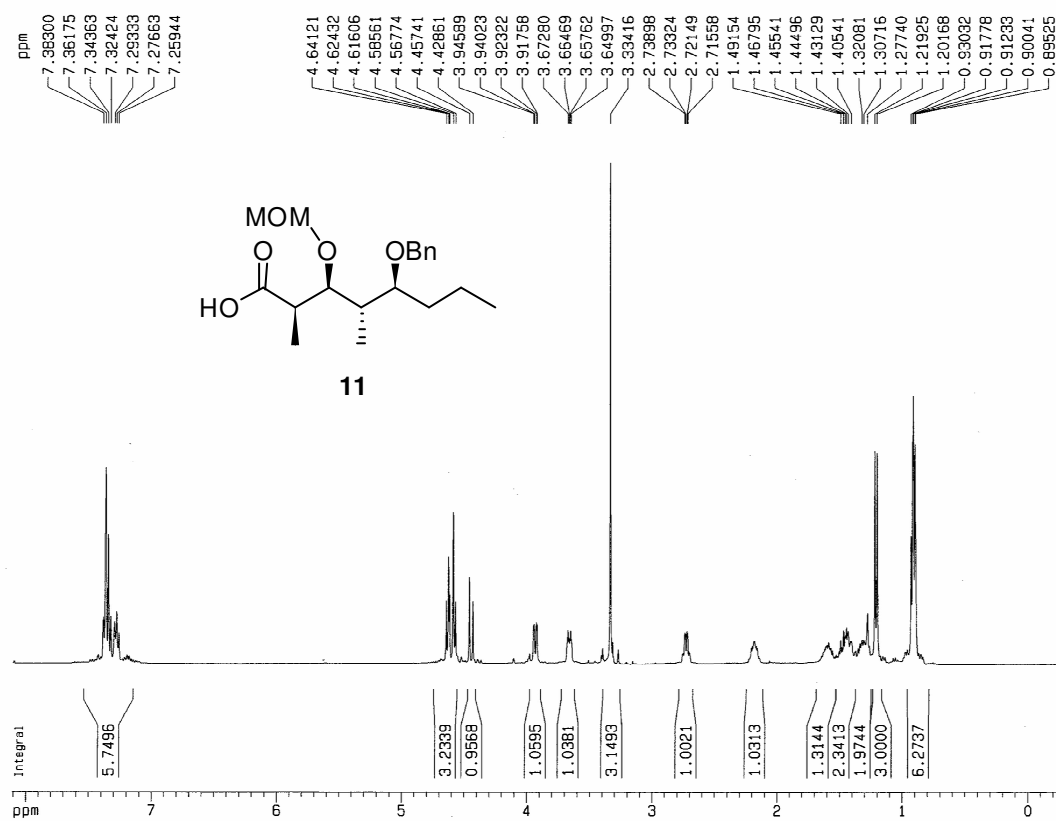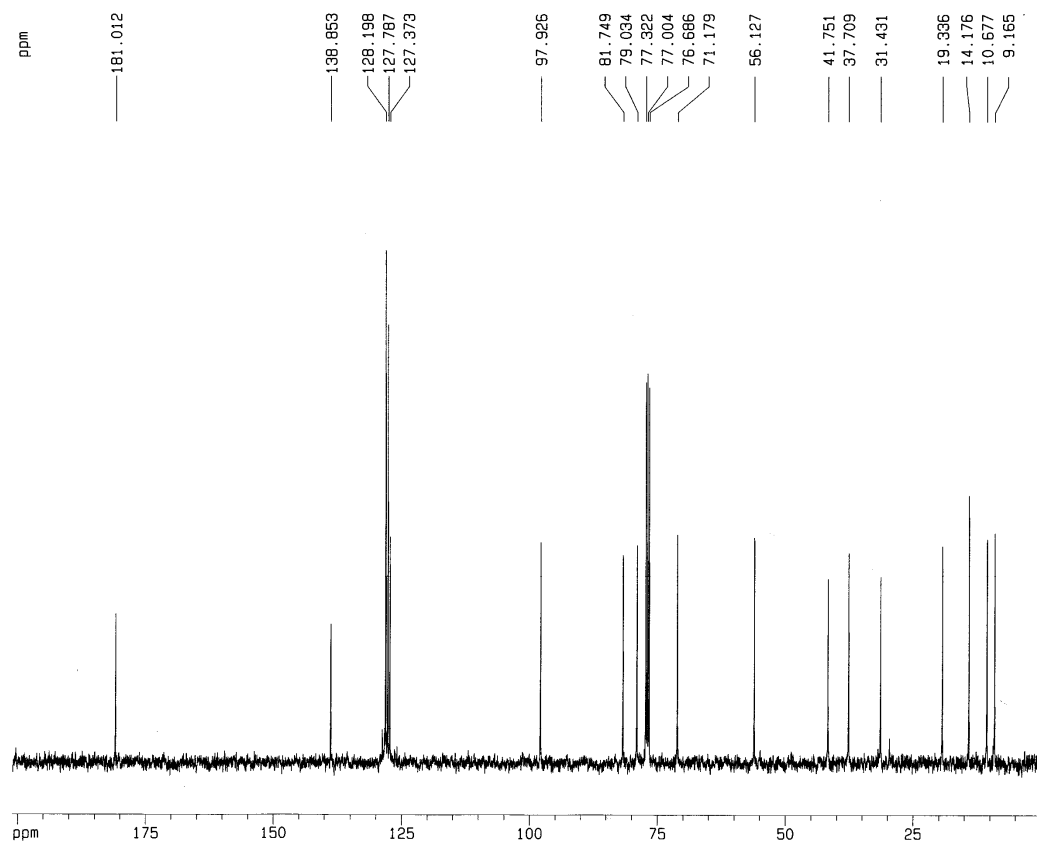

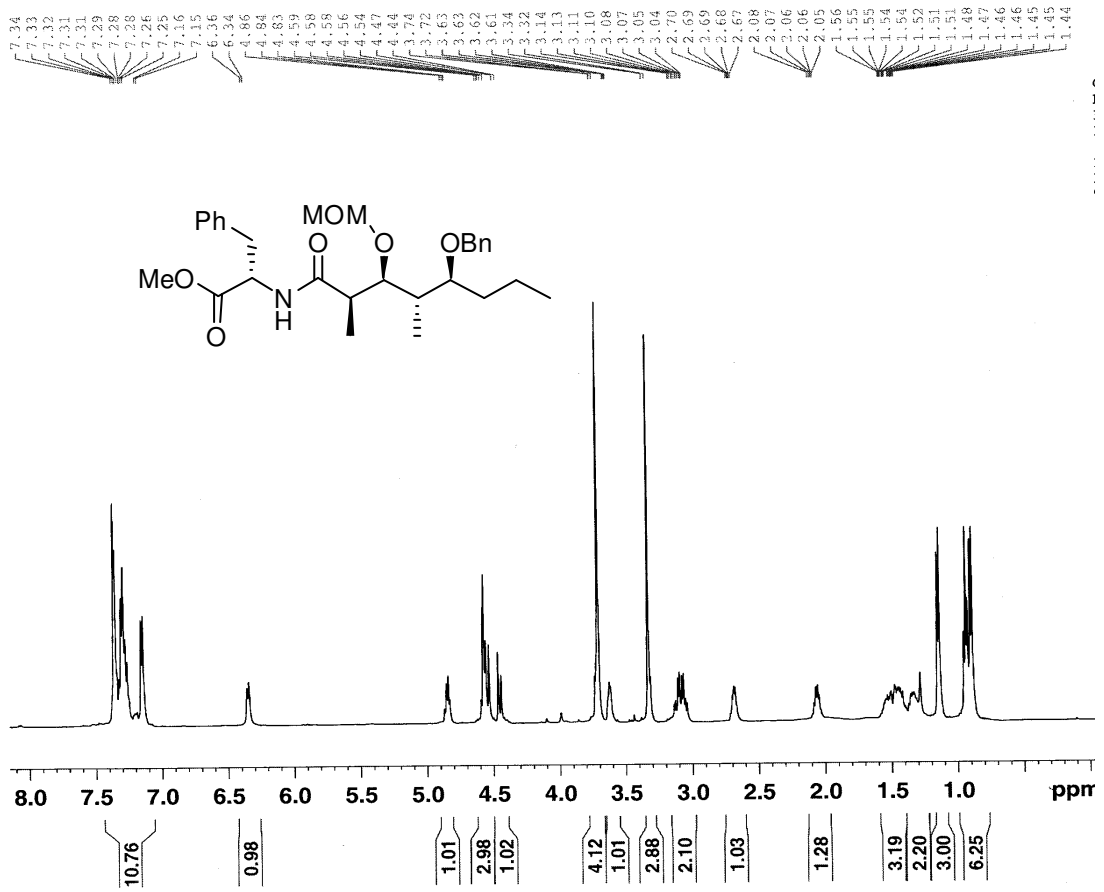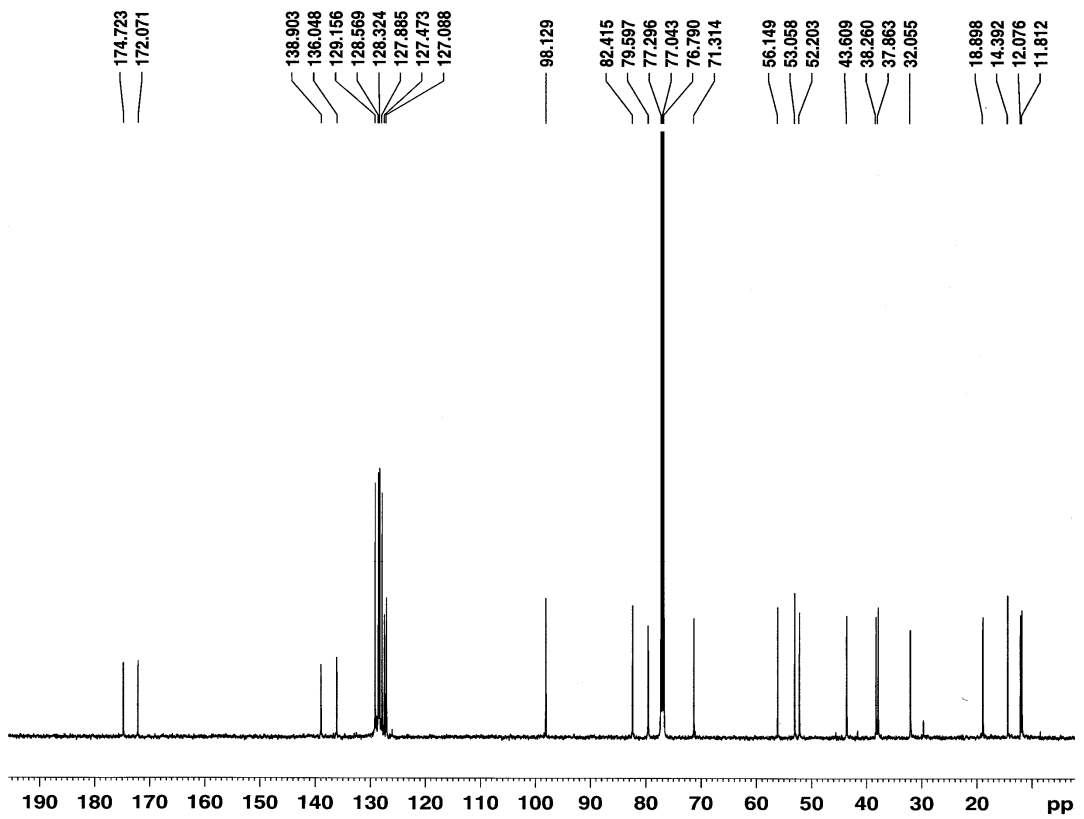



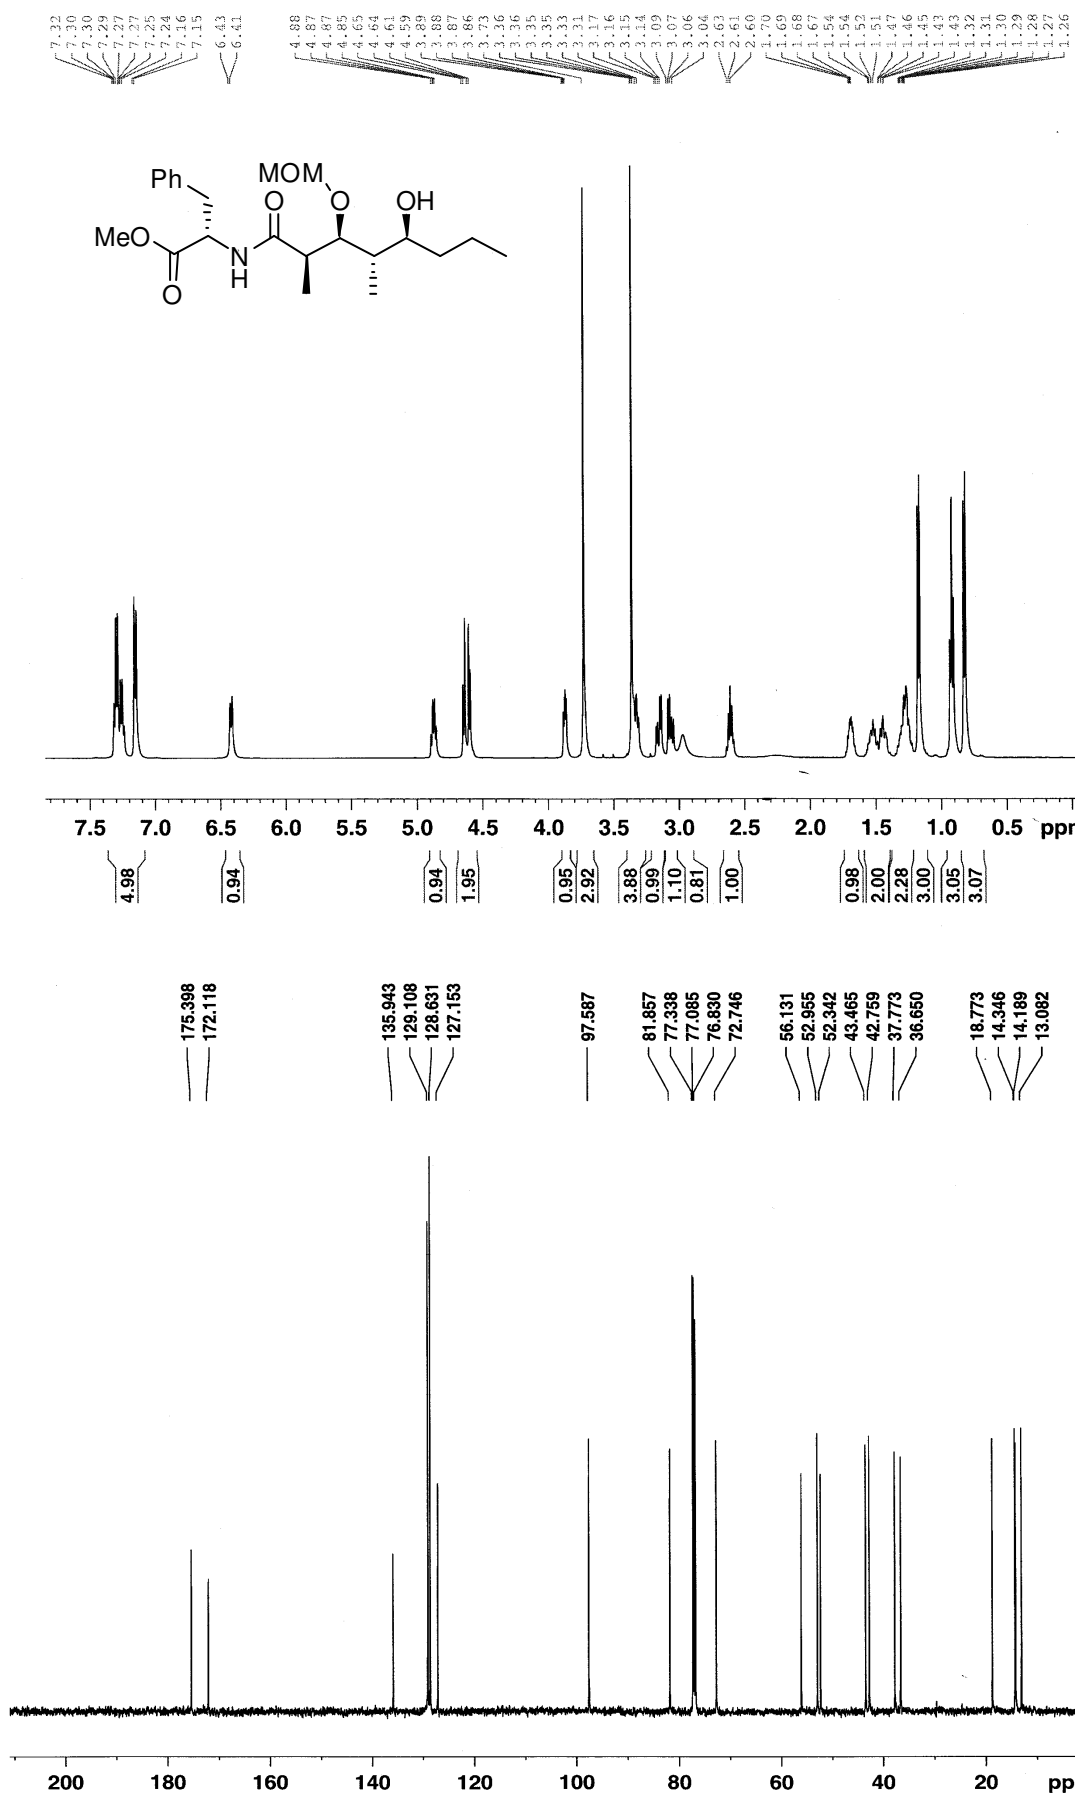

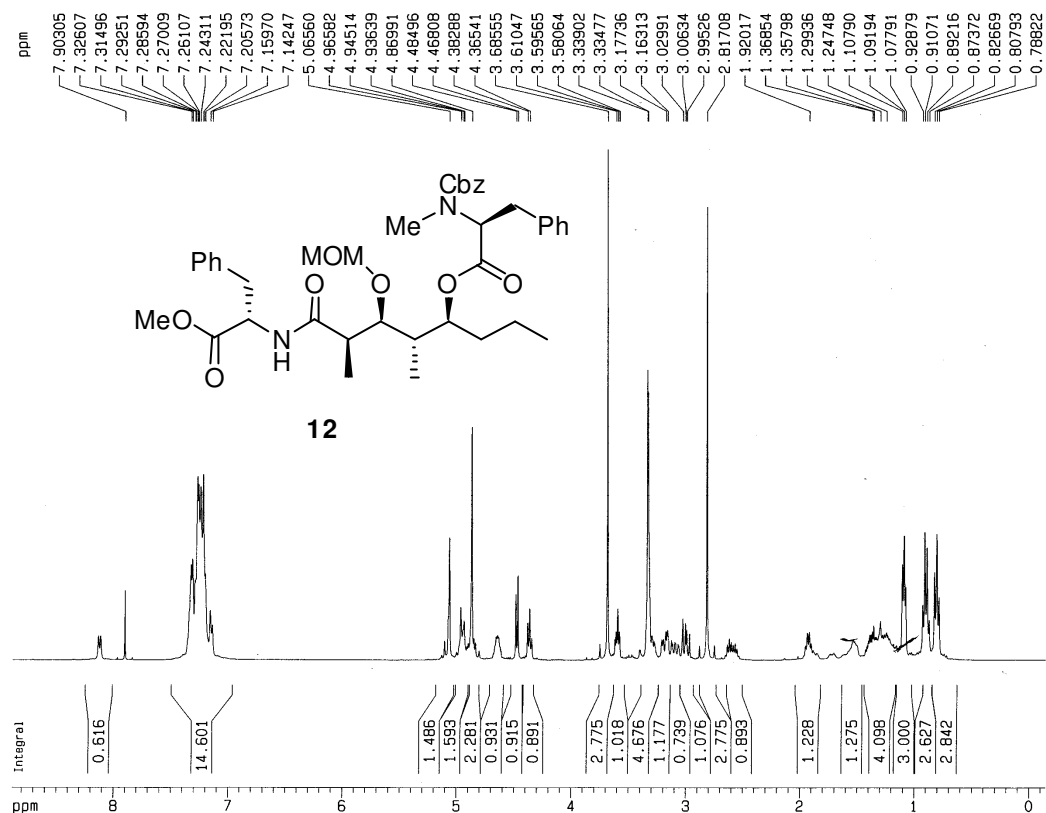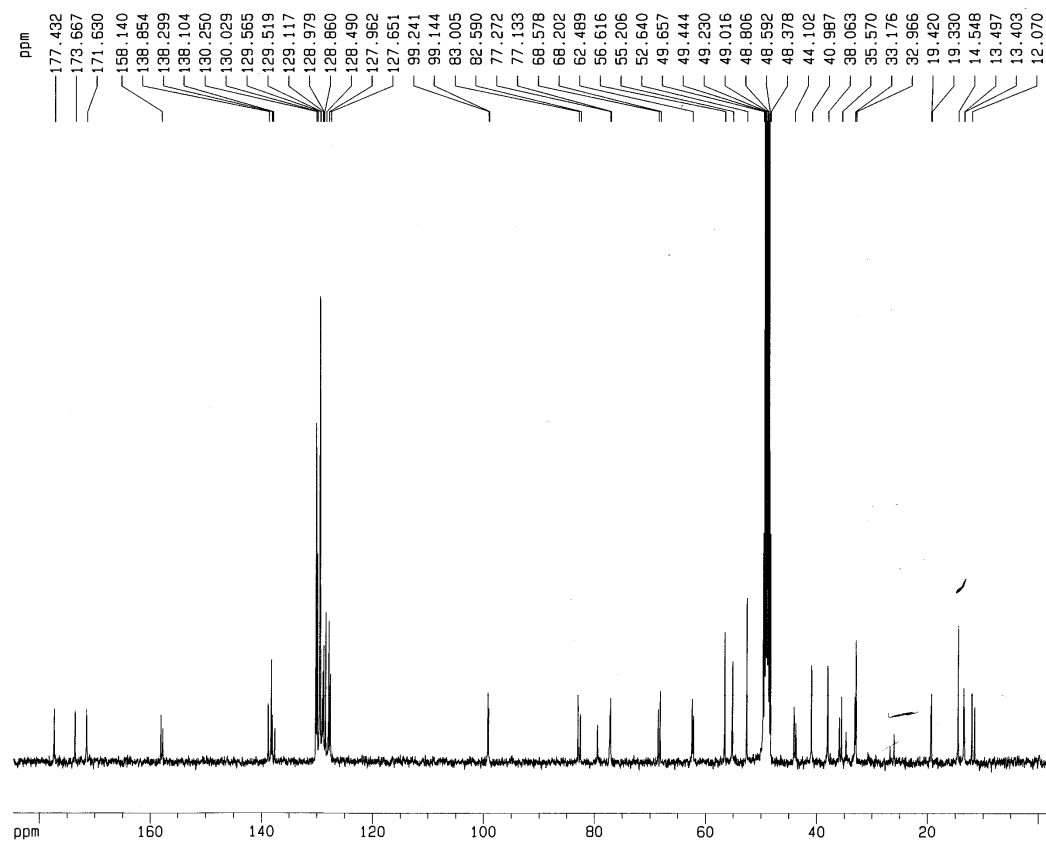



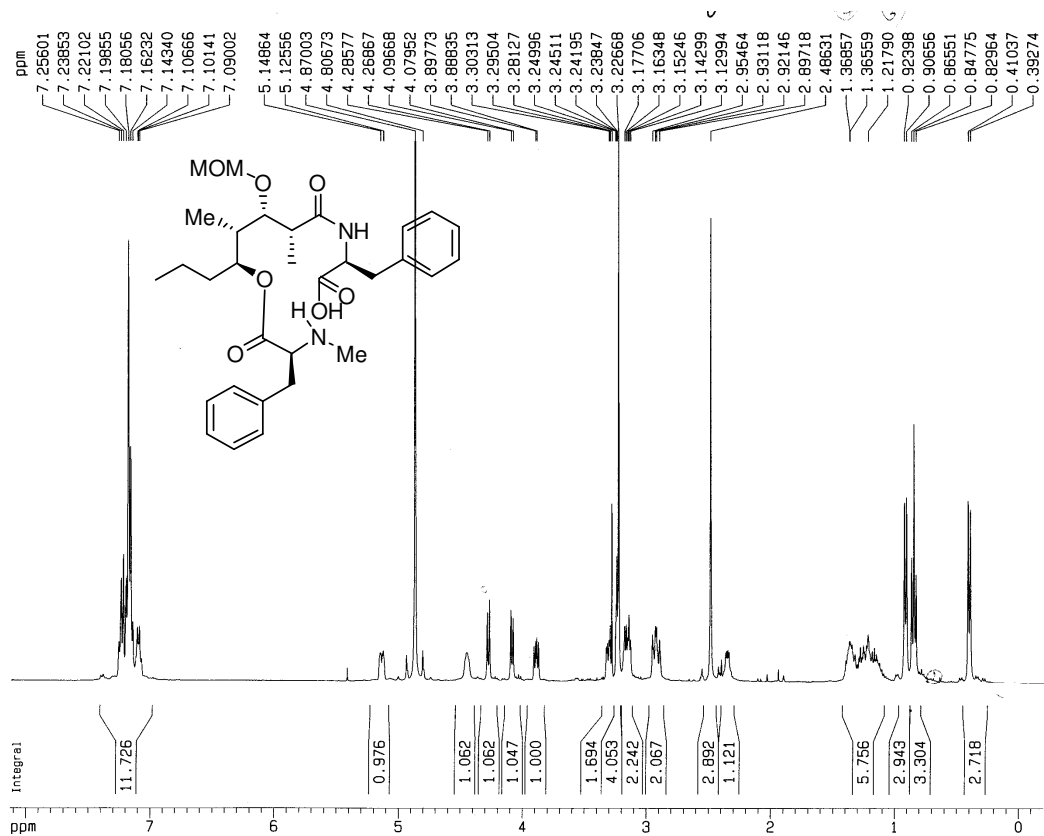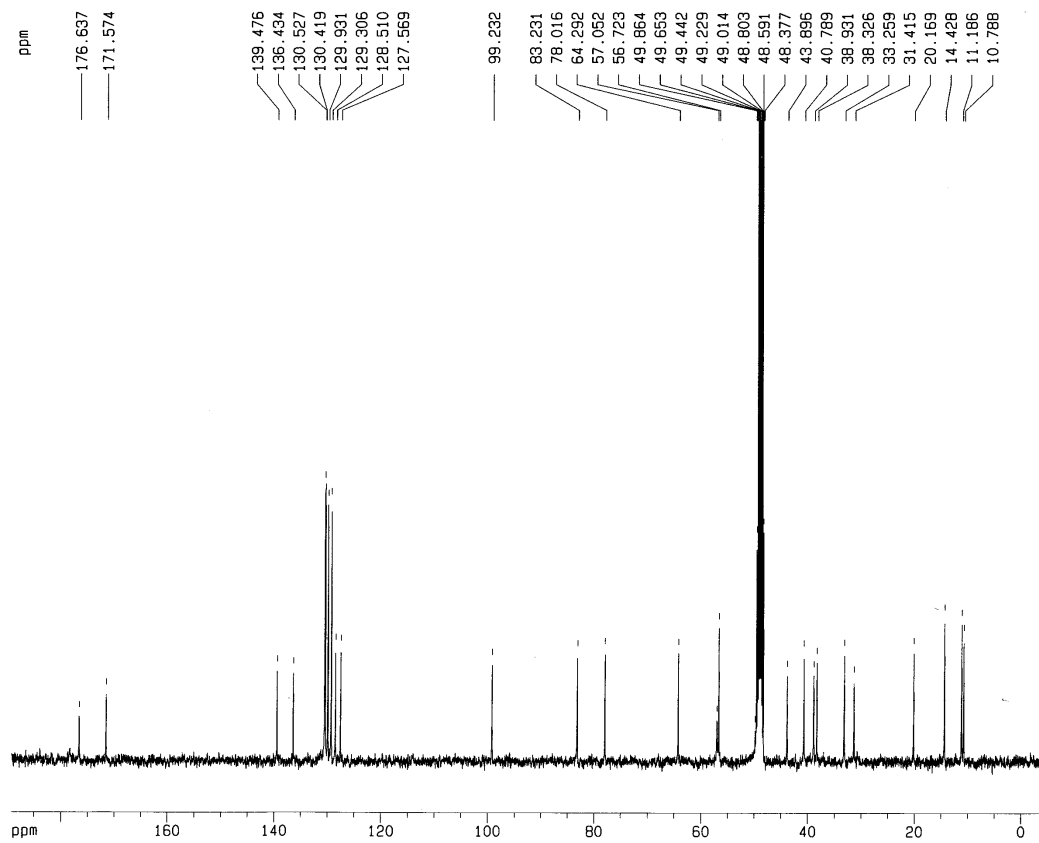

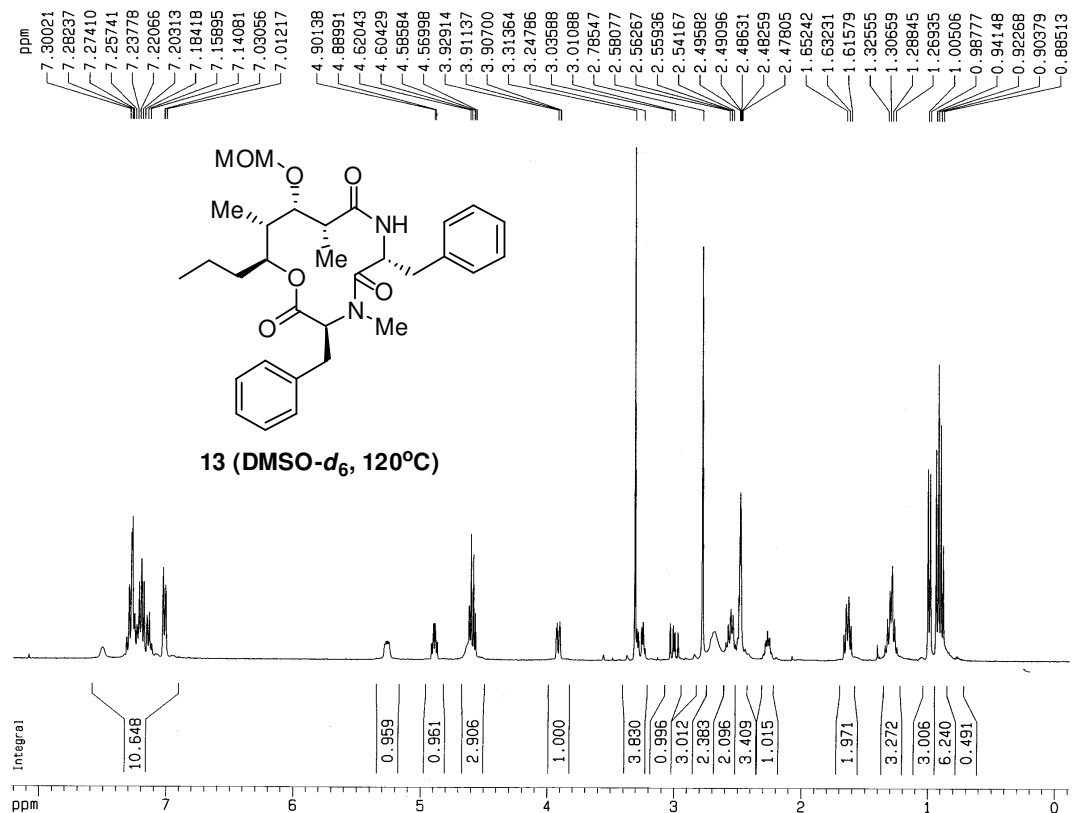

C13 standard parameters, cryoprobe (#02), CD3OD.

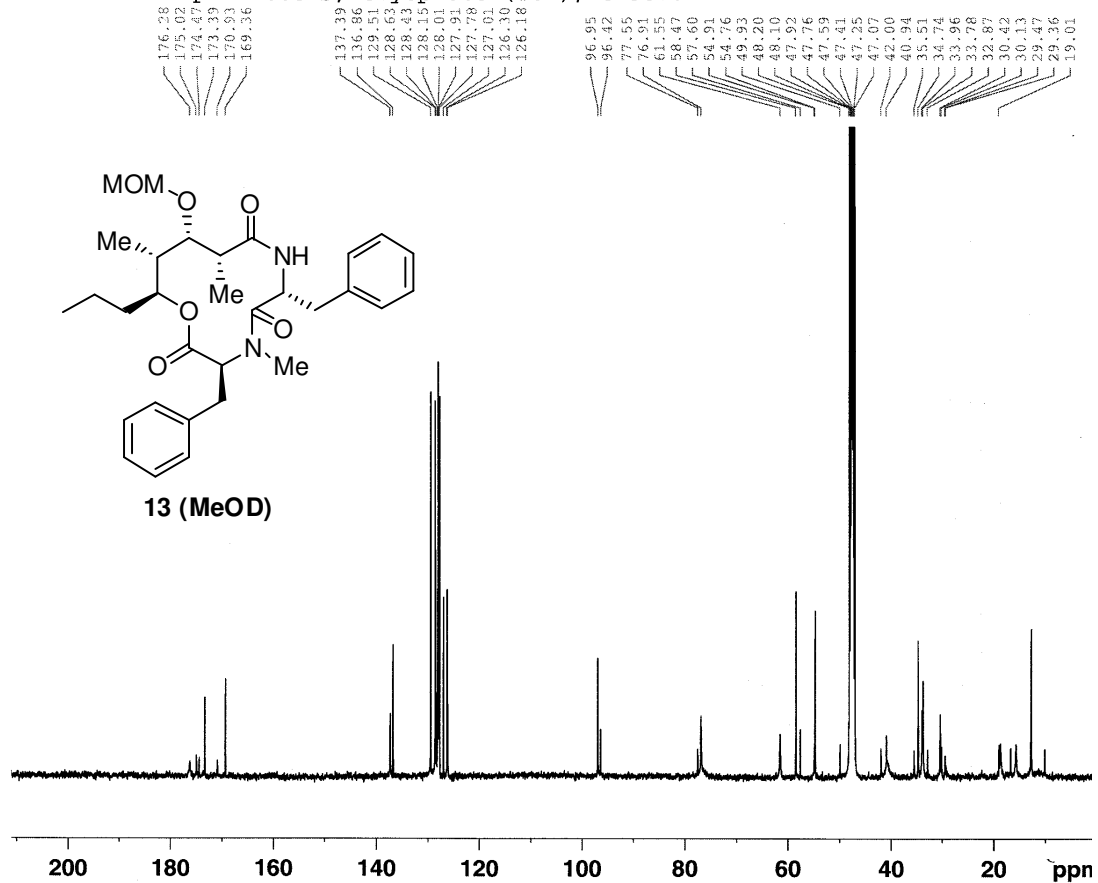

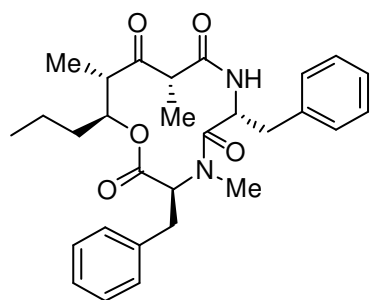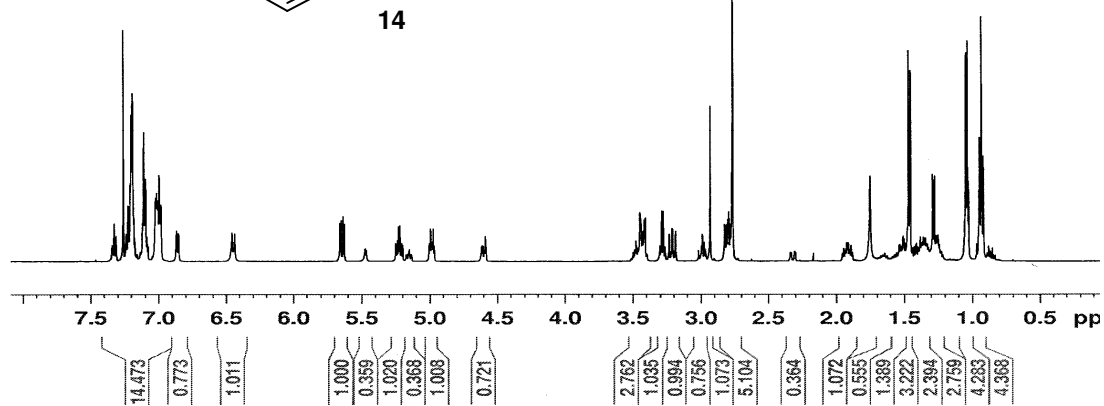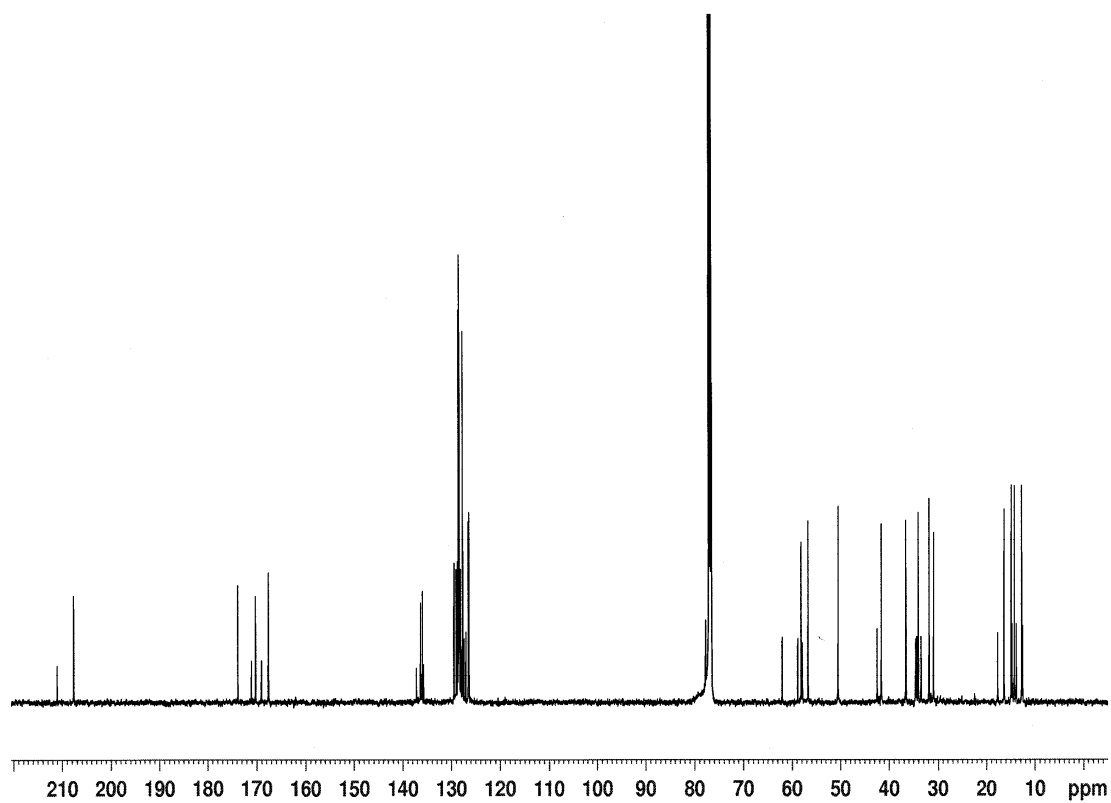

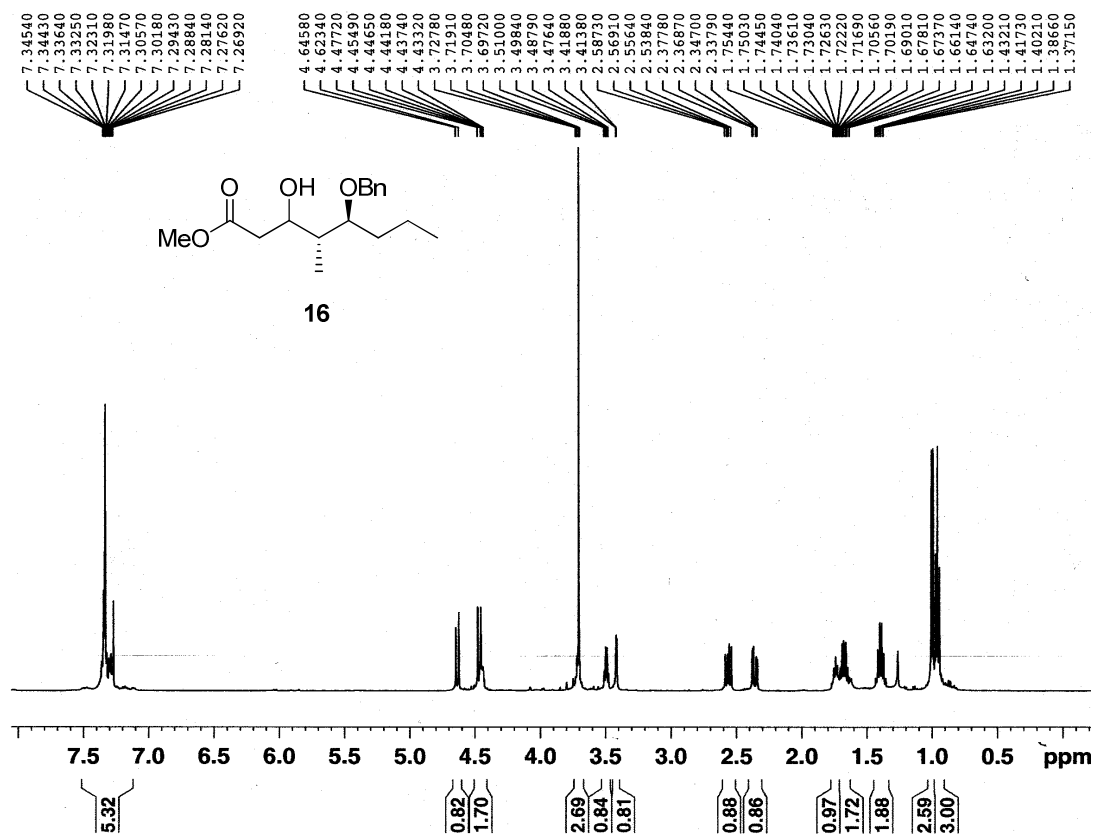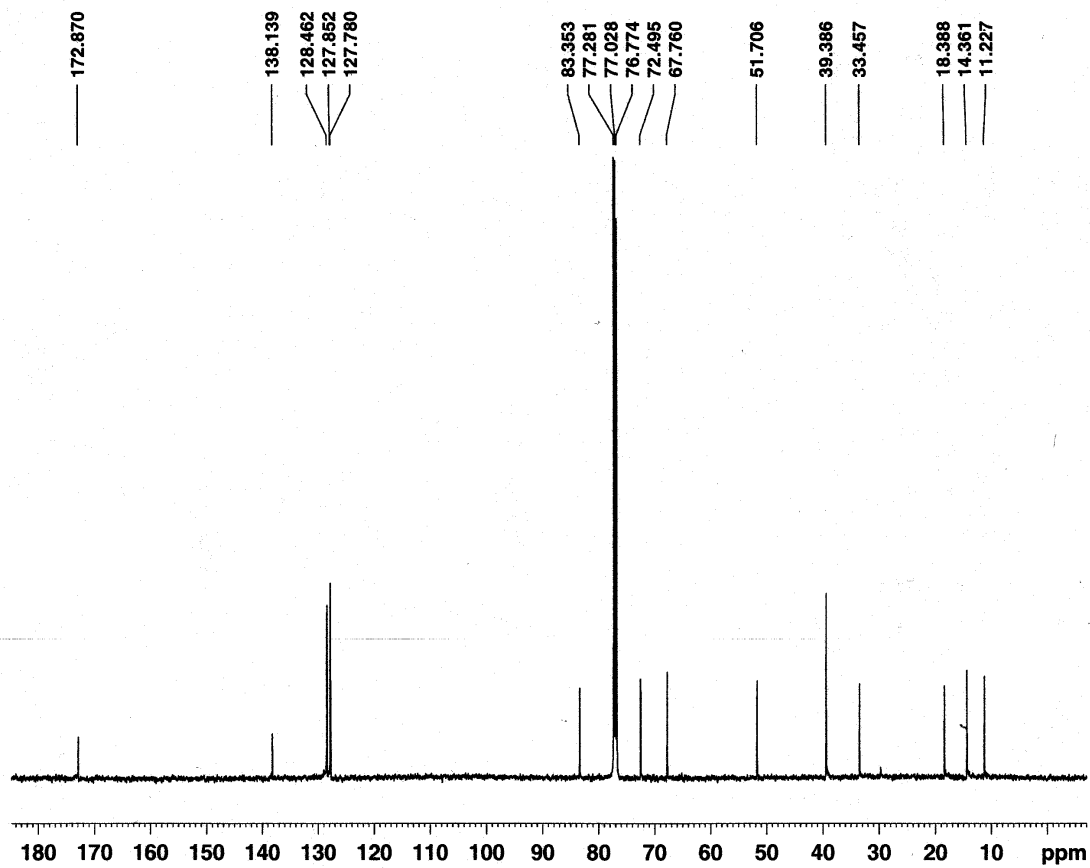

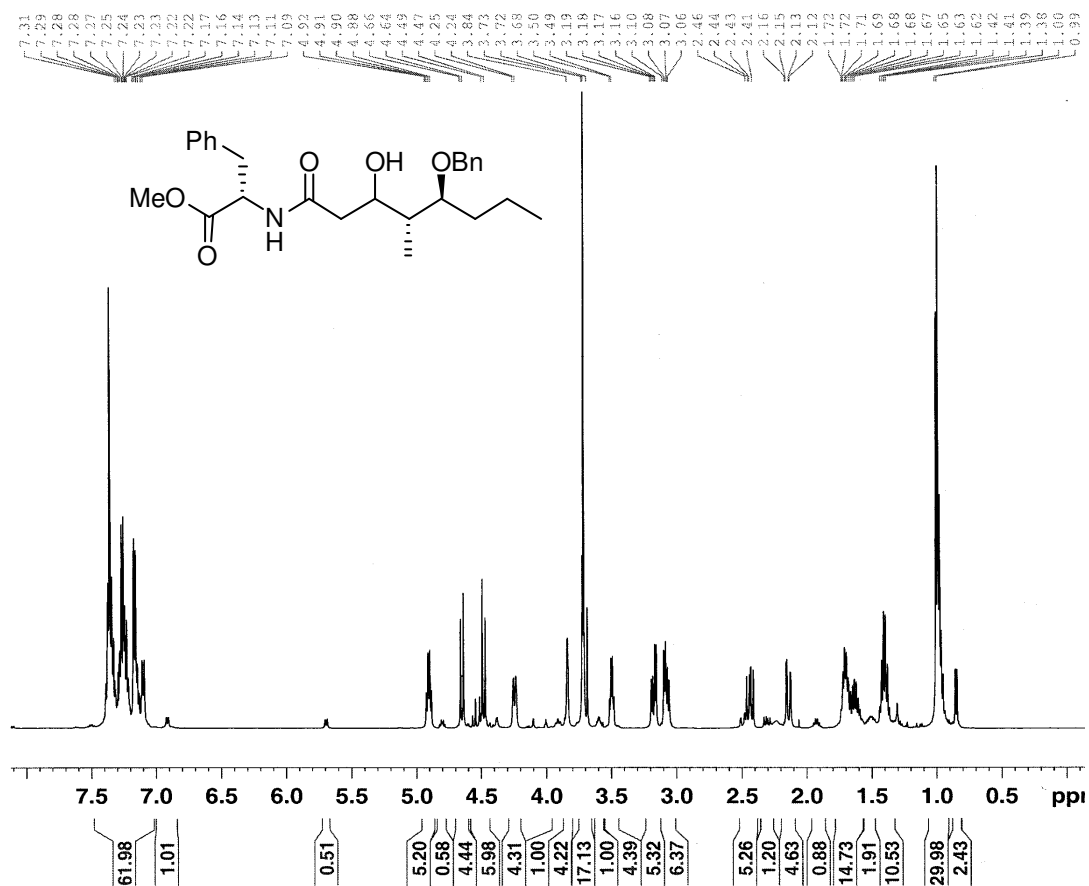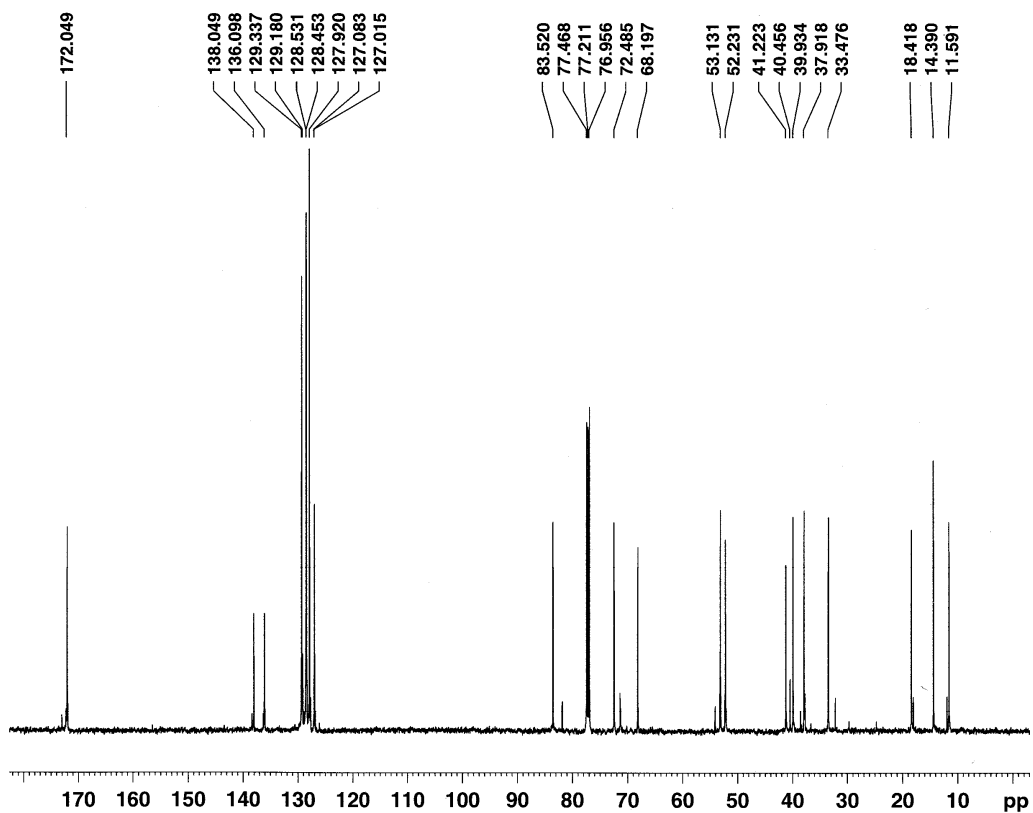





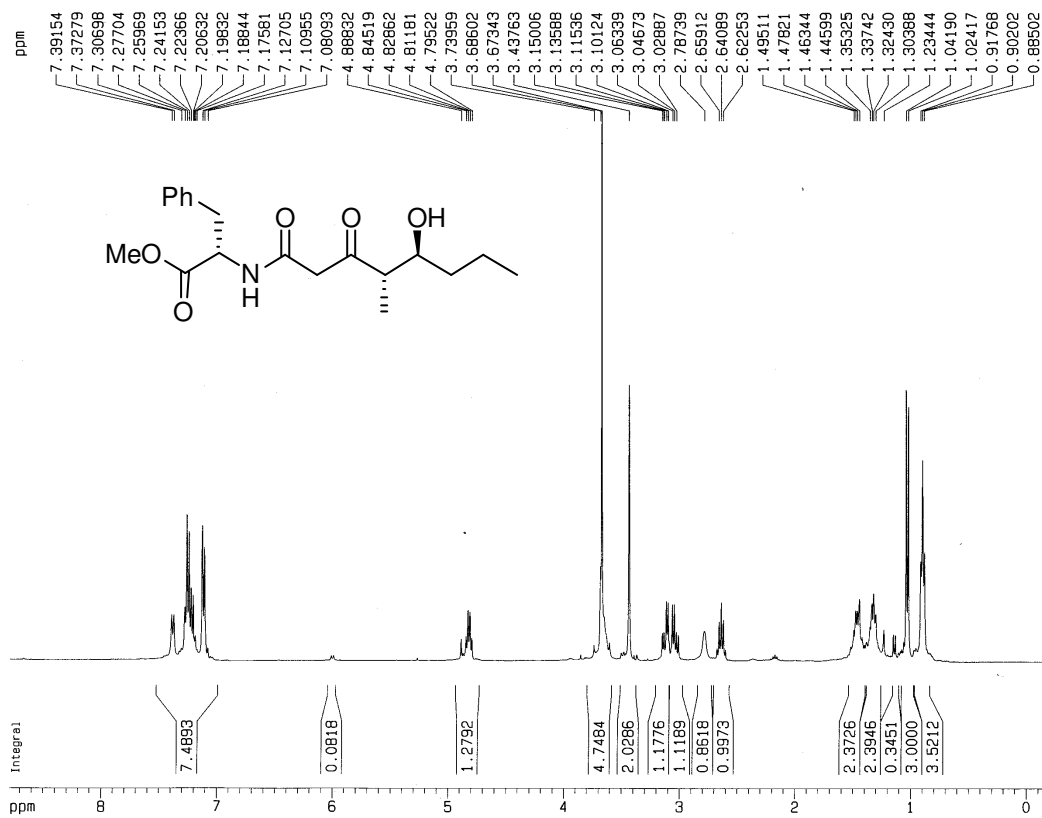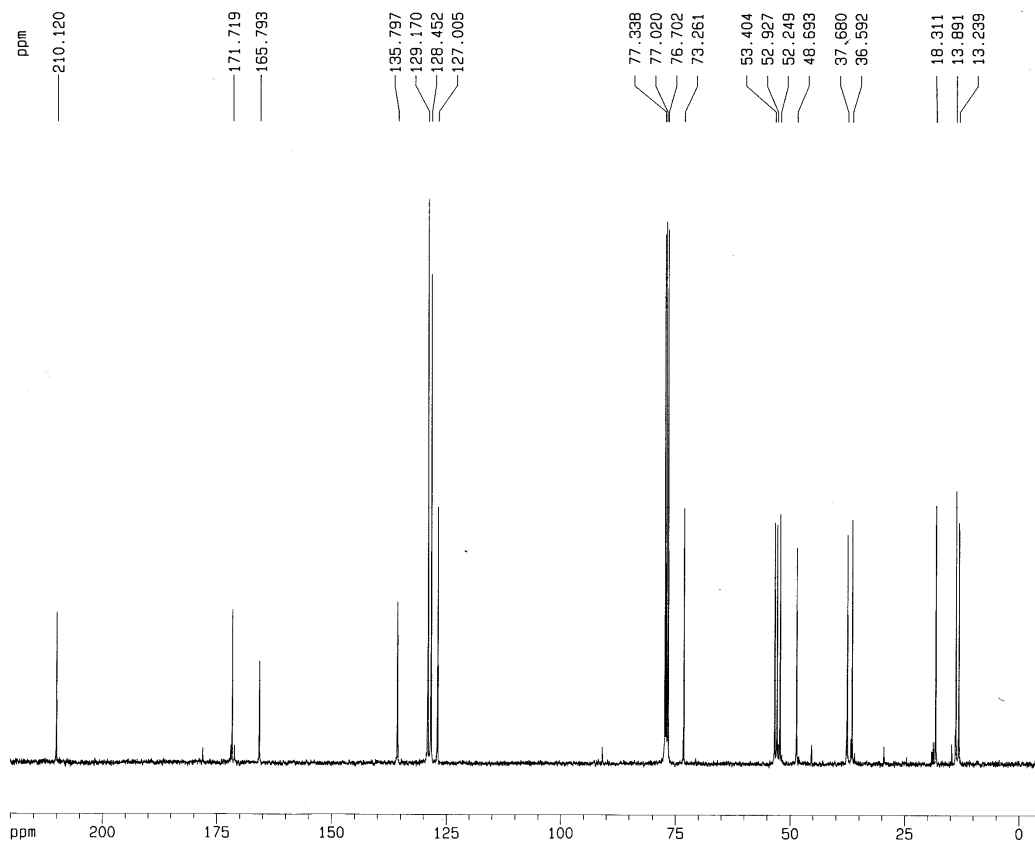

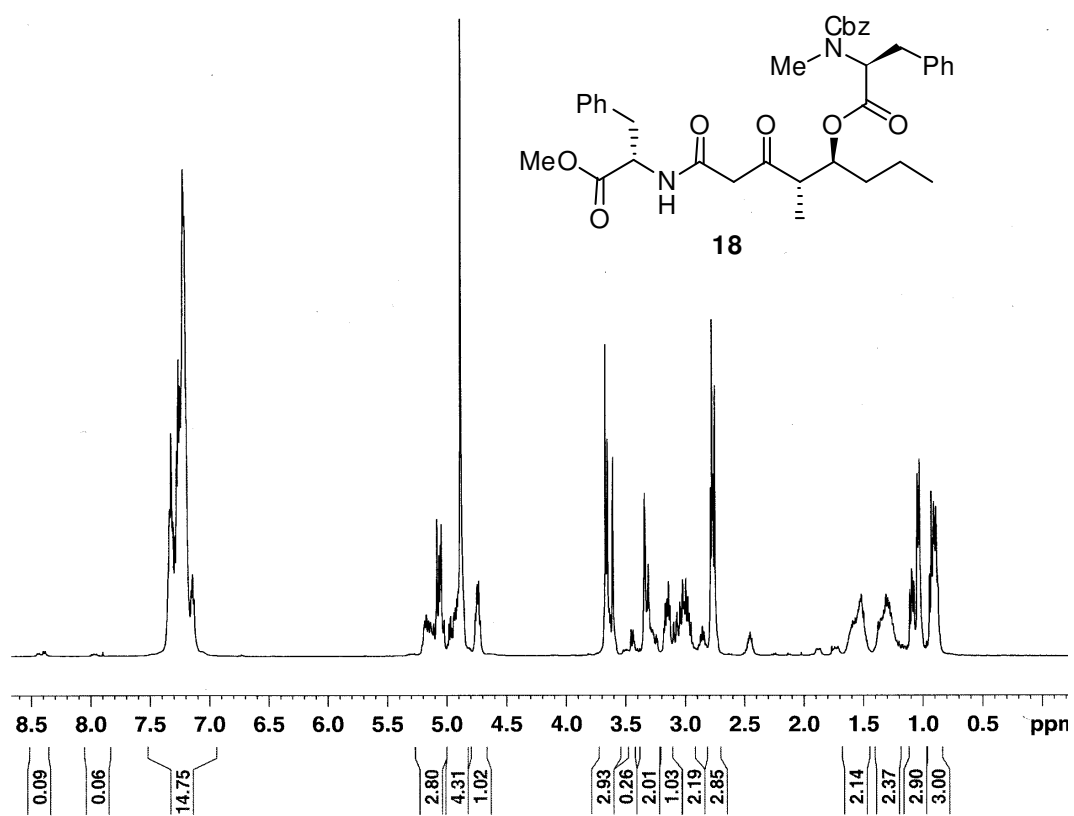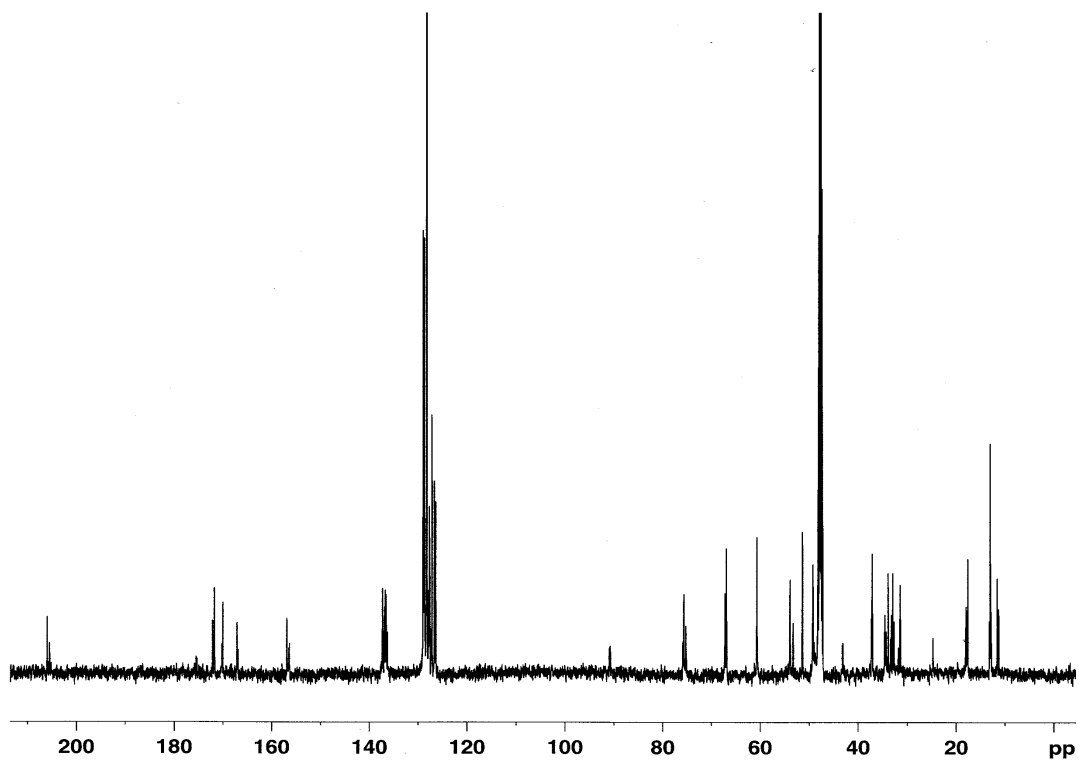

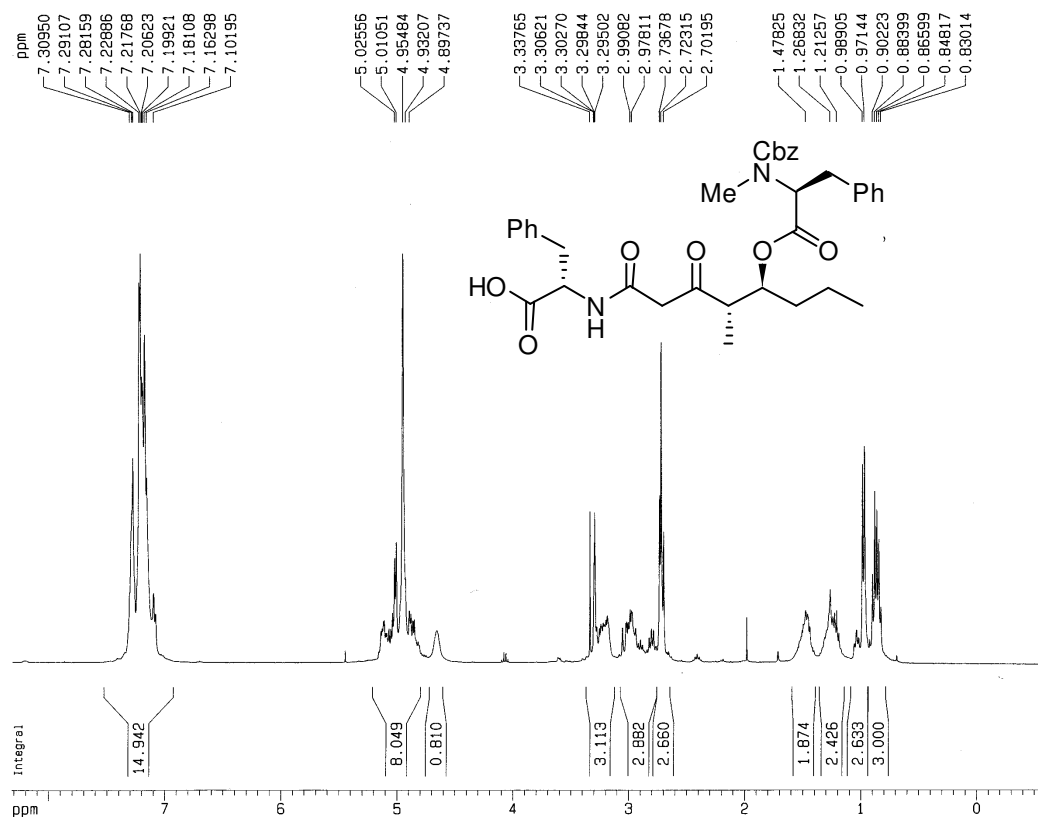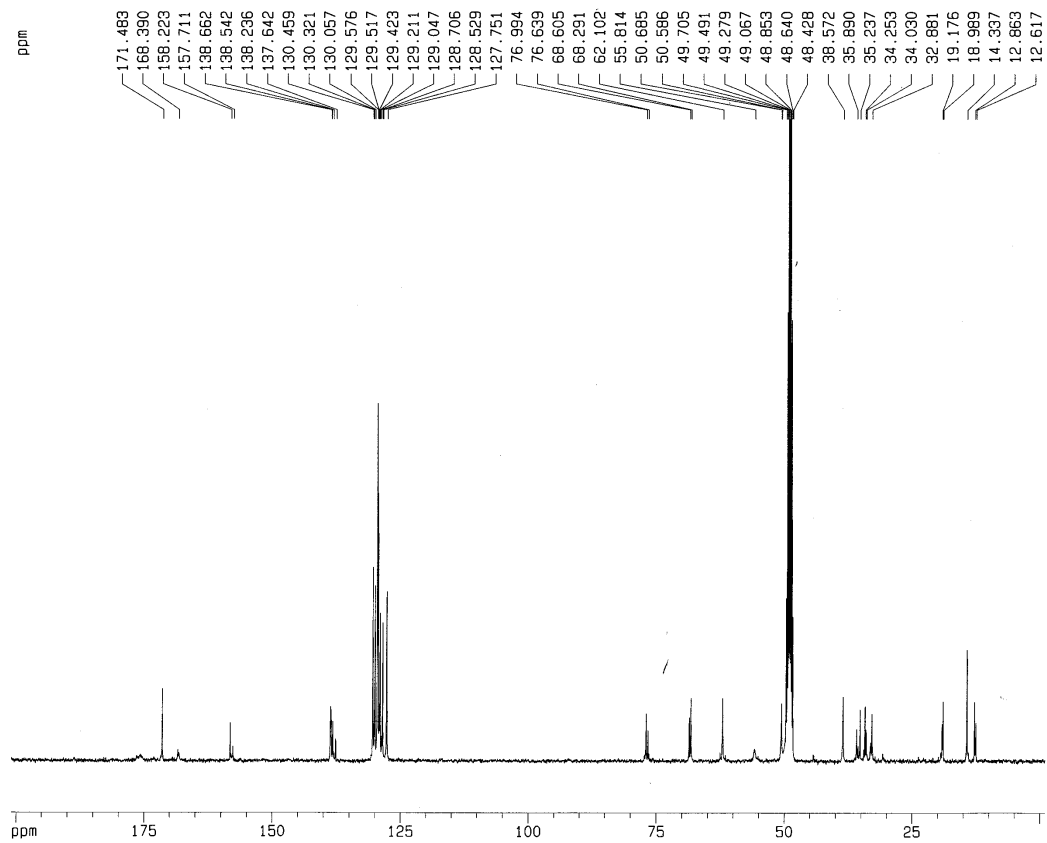

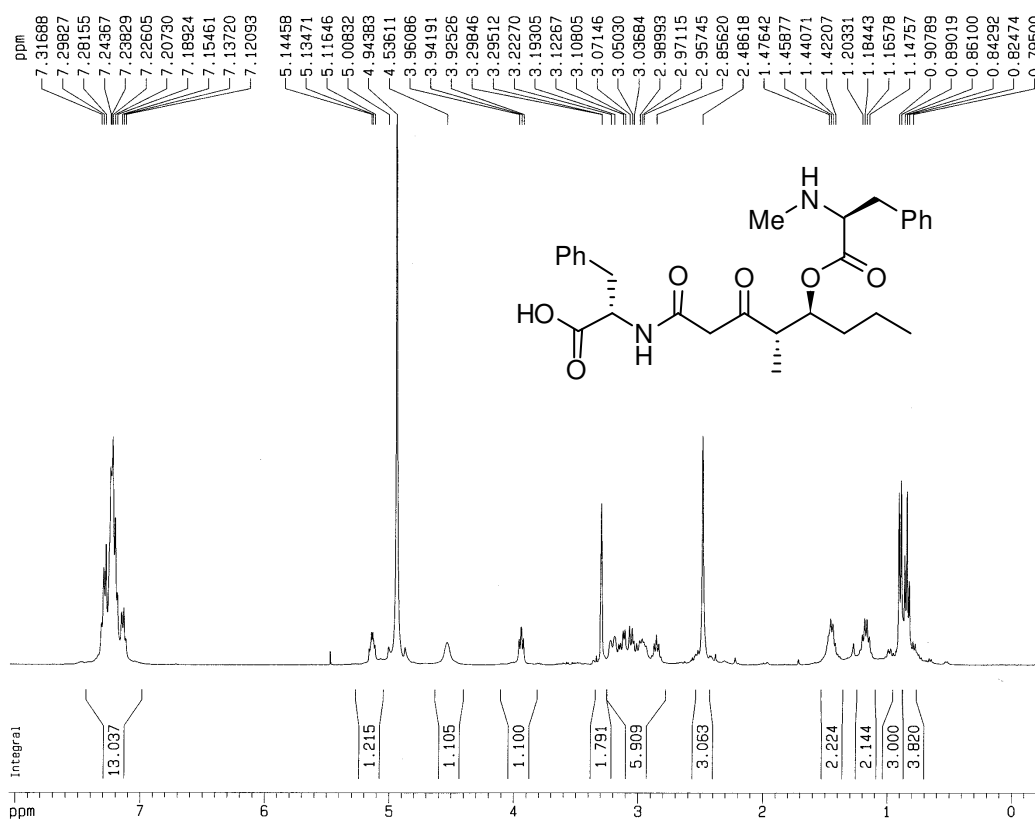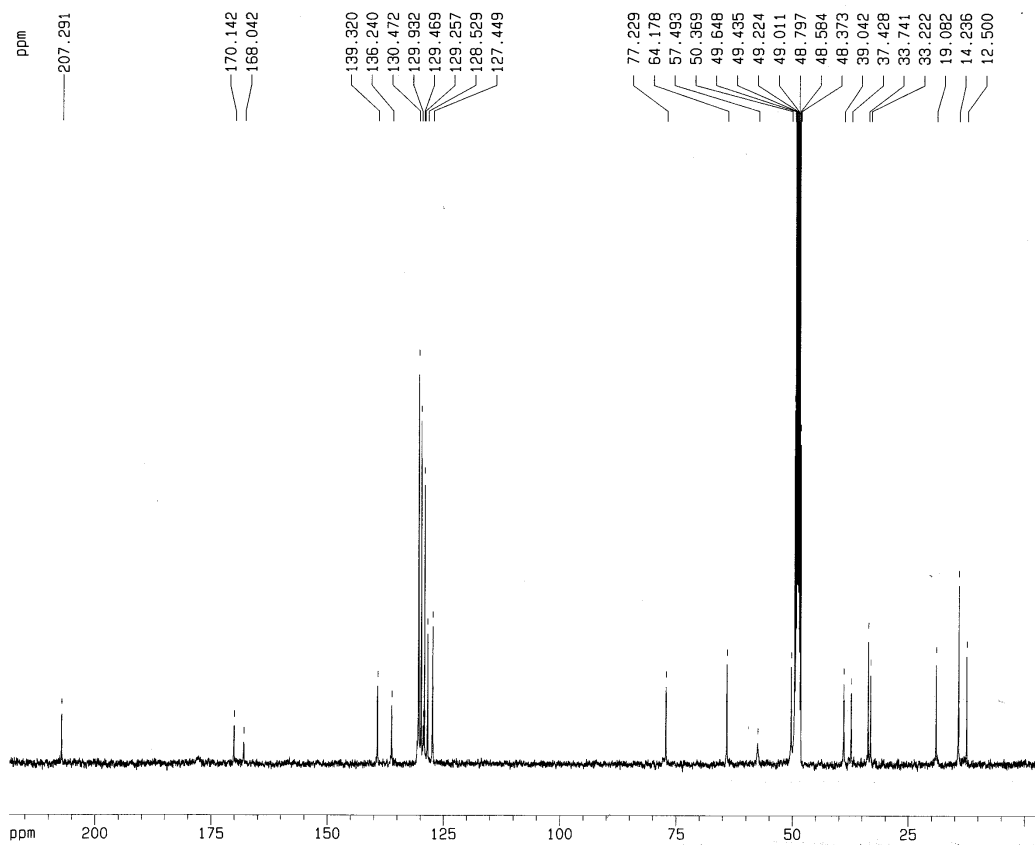

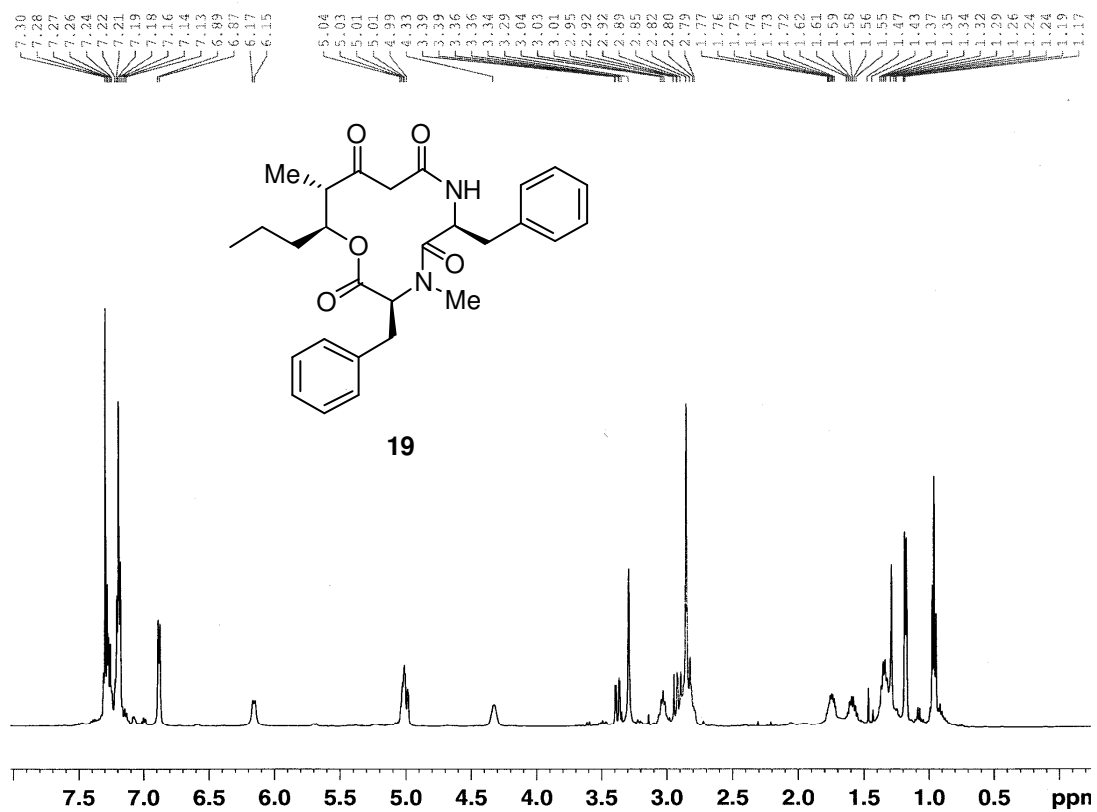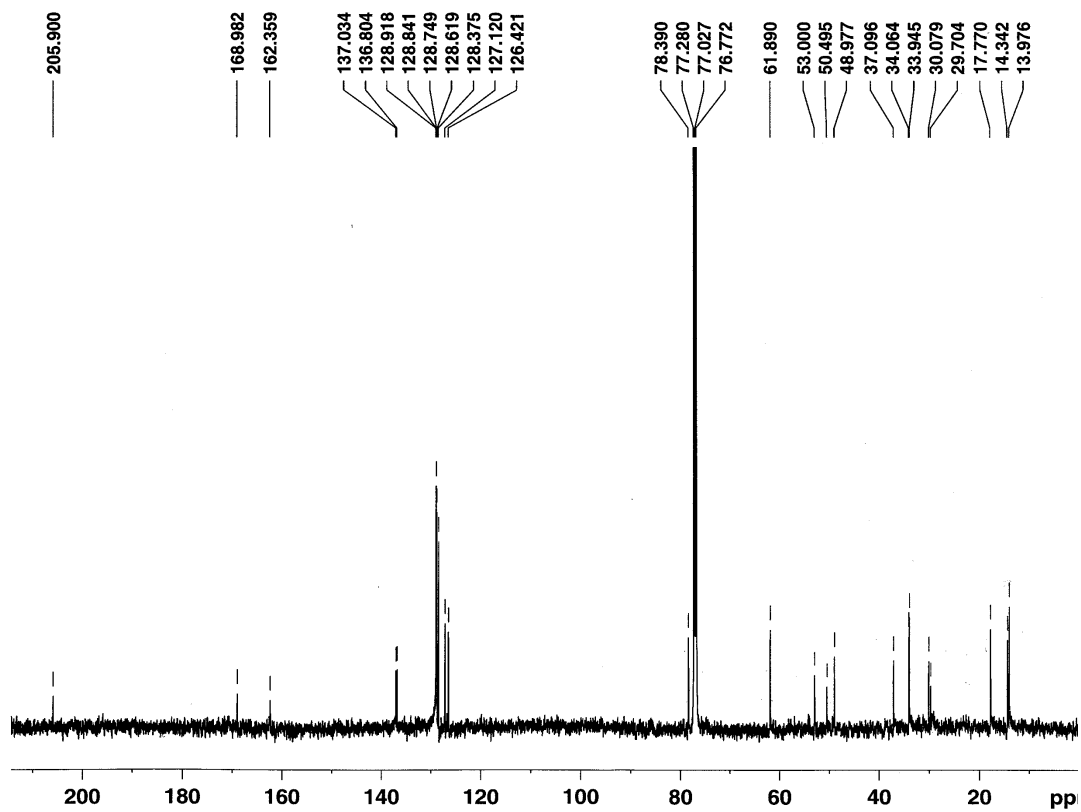

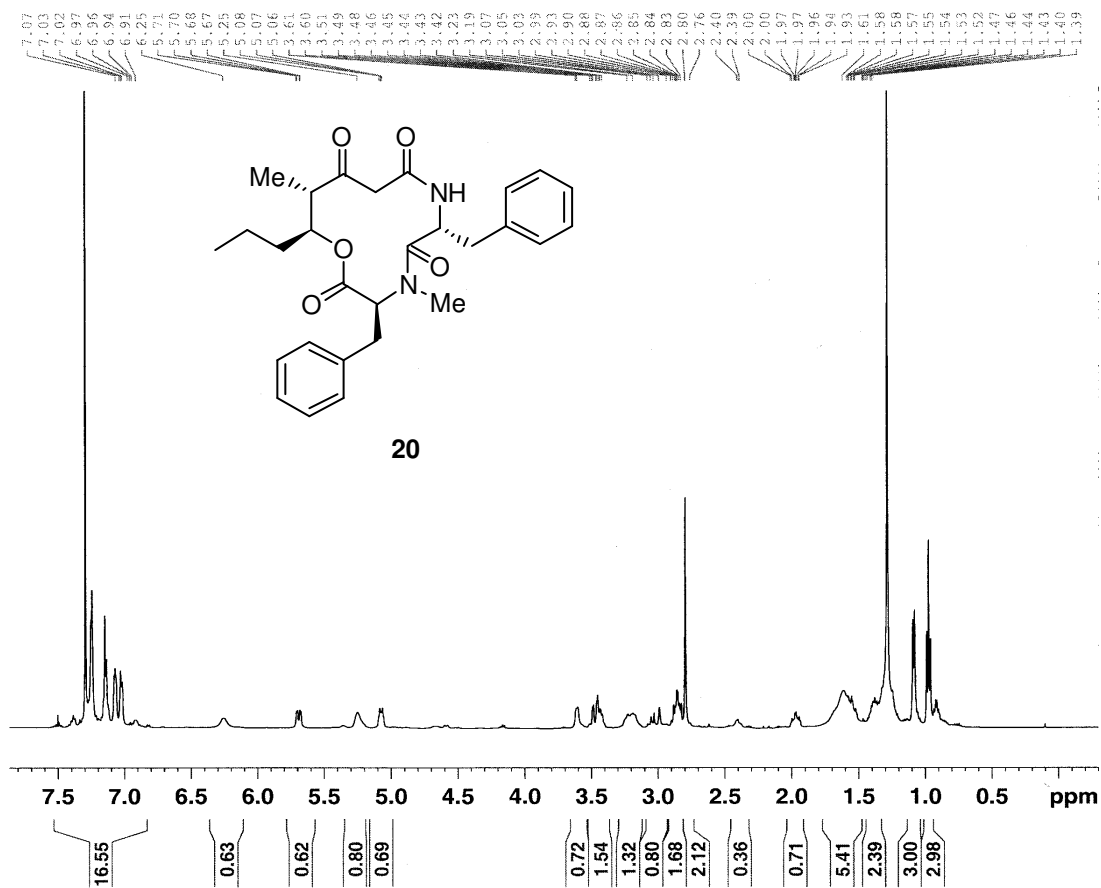

1e Pulse Experiment

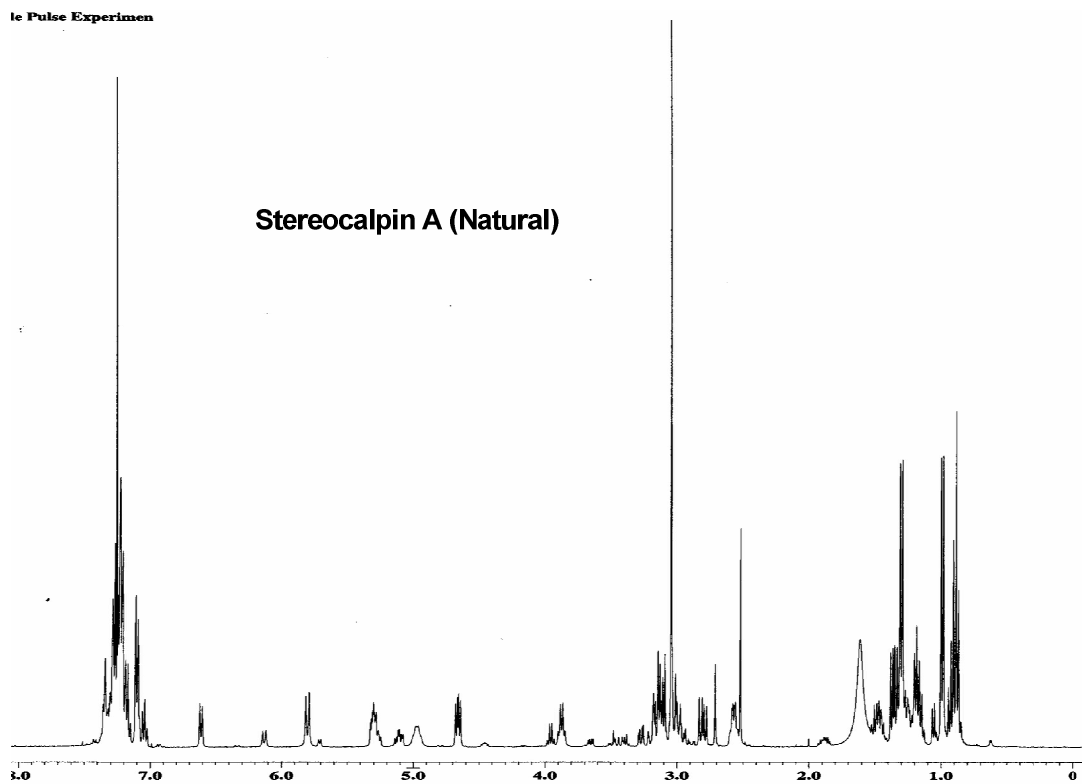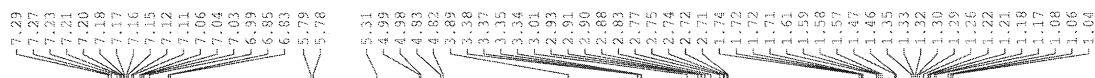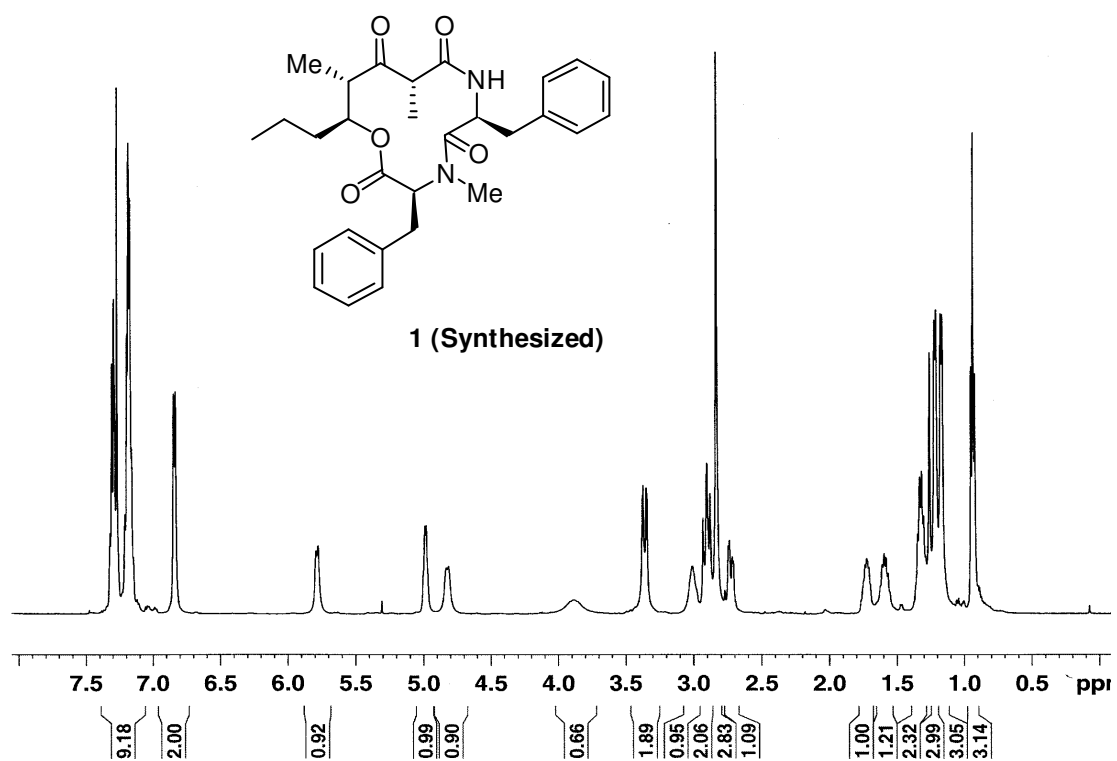



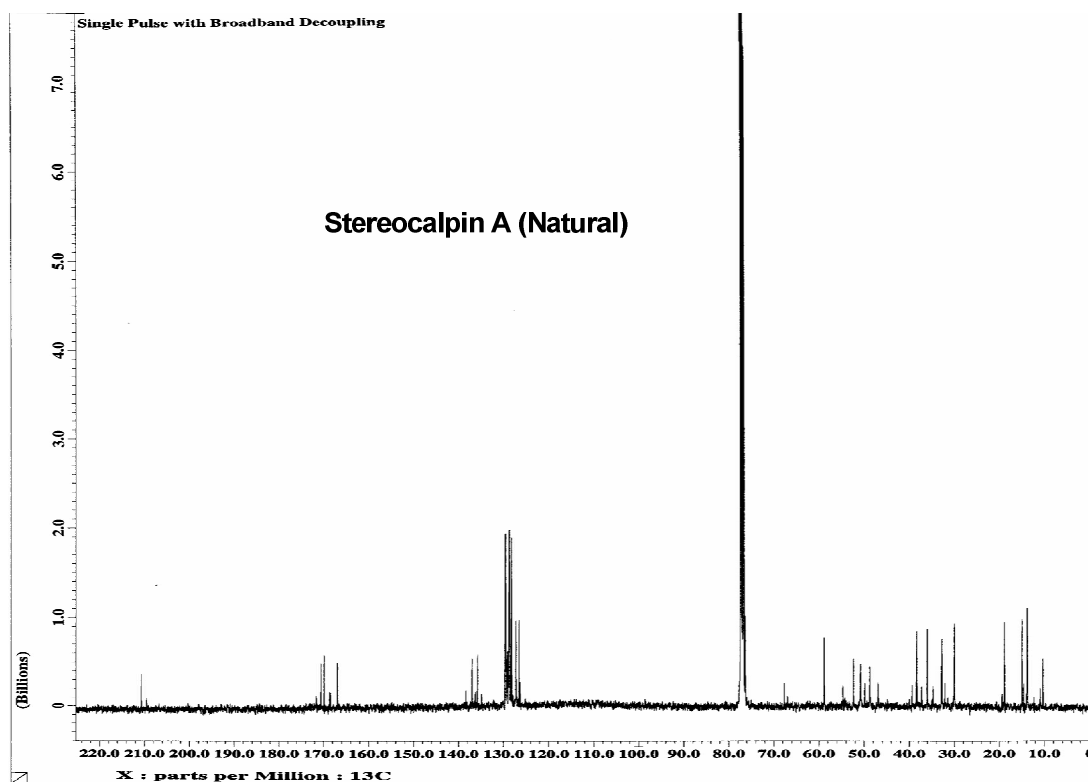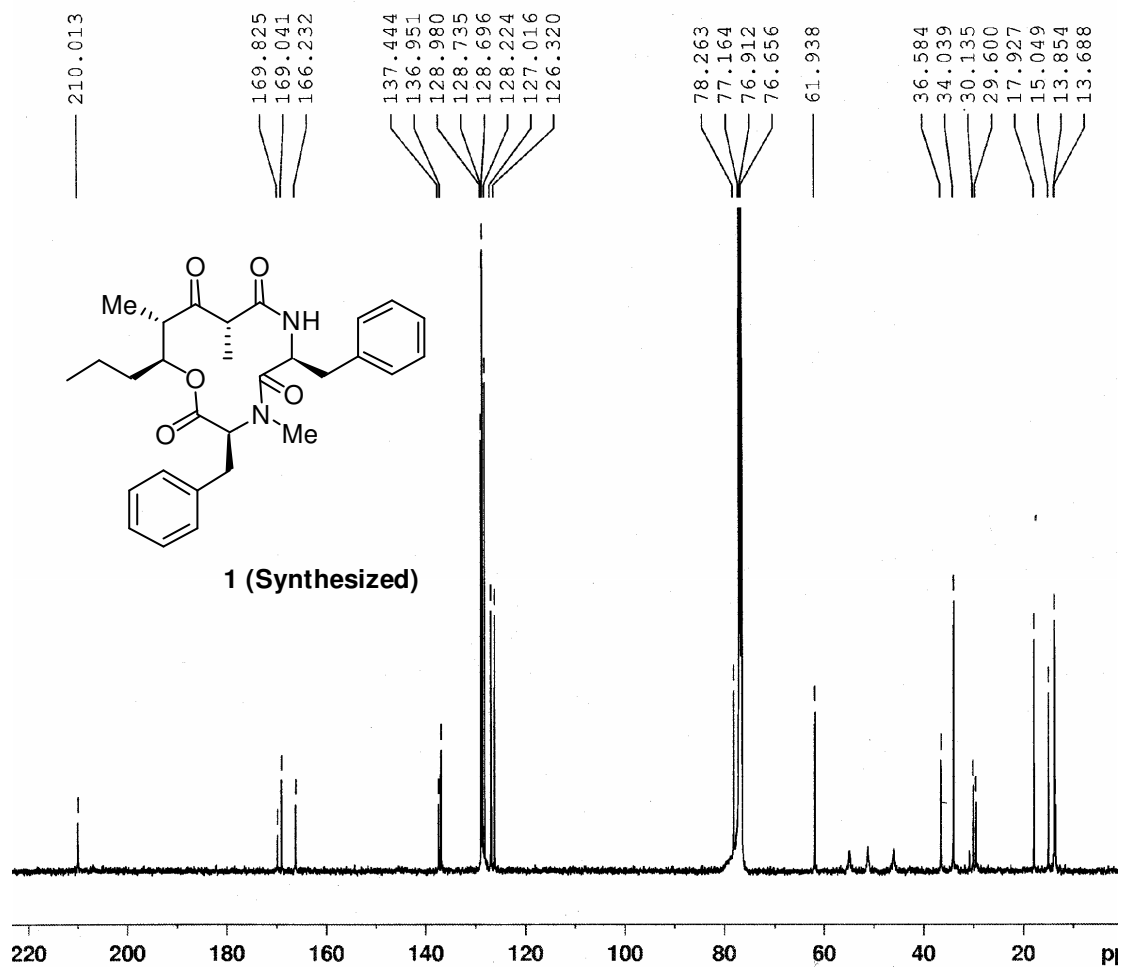

C13 DEPT-135 standard parameters, BBO probe.  
 Changes DEPT-45 and DEPT-90 experiments.

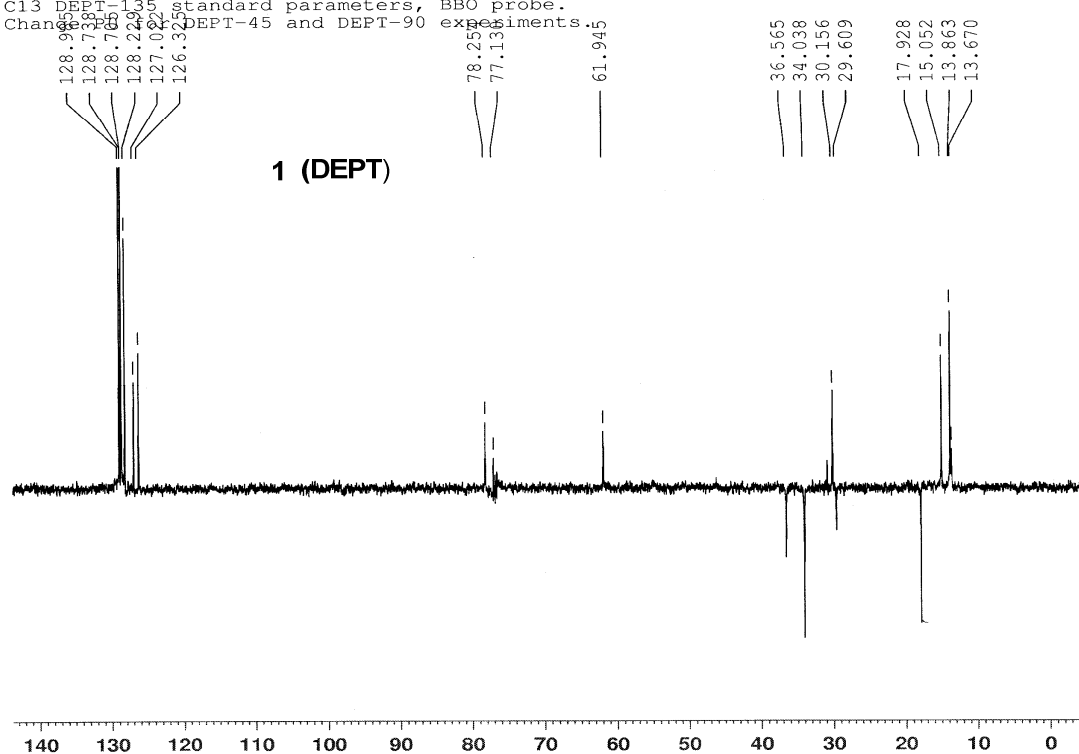

1 (COSY)

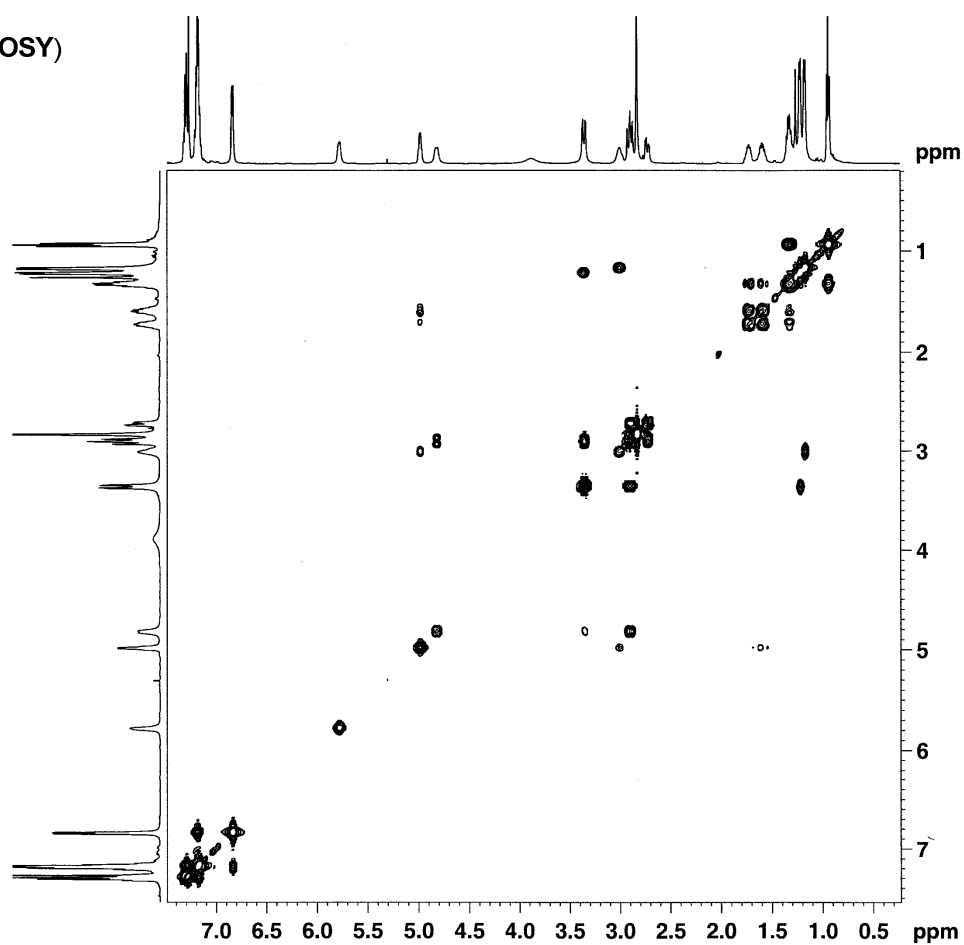

NOESY standard parameters, cryoprobe (#02), CDCl<sub>3</sub>.  
Phase-sensitive, T<sub>m</sub> = 500msec. Turn spinning off.

**1 (NOESY)**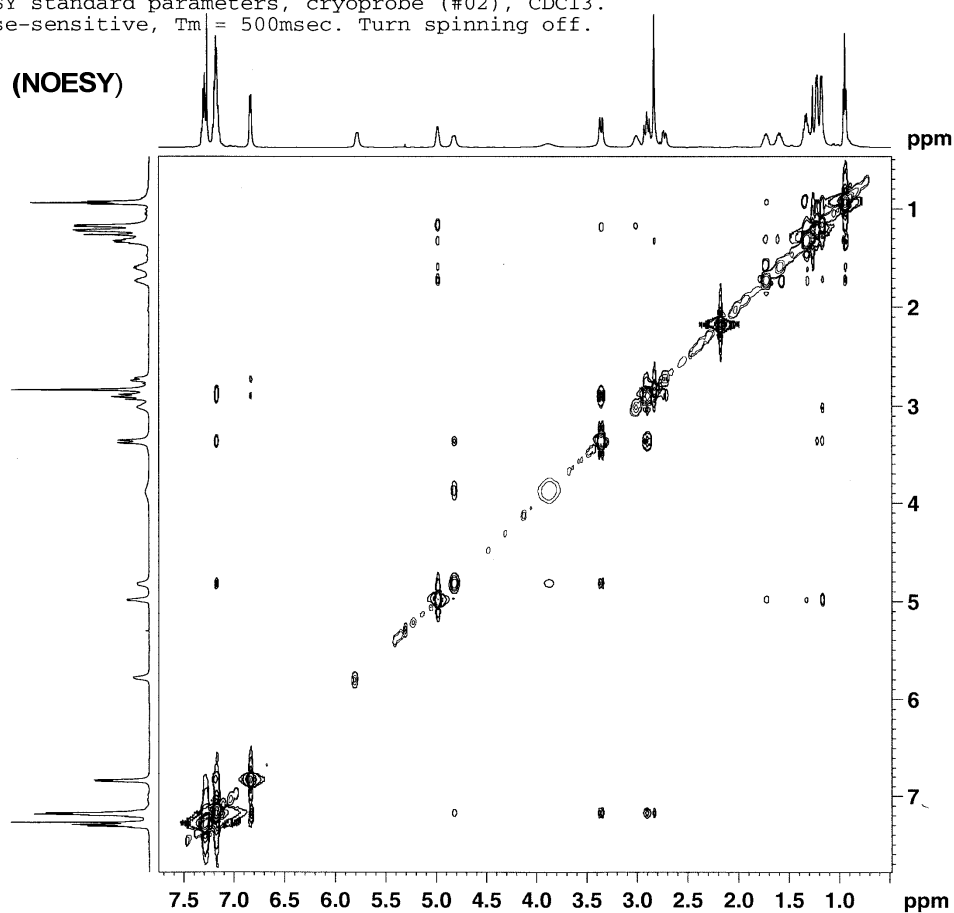**1 (HMQC)**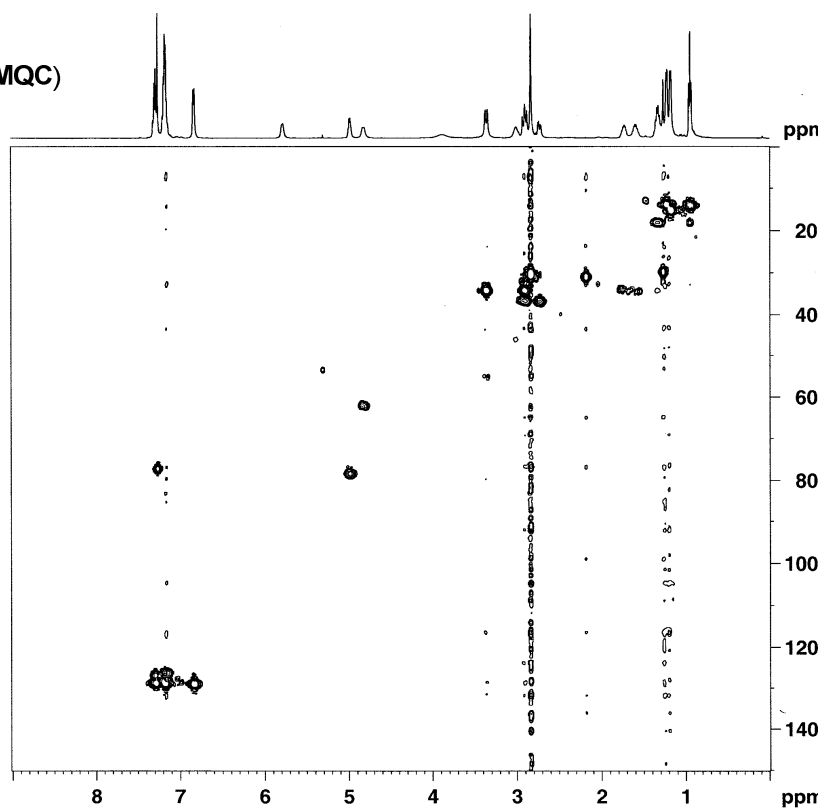

## 1 (HMBC)

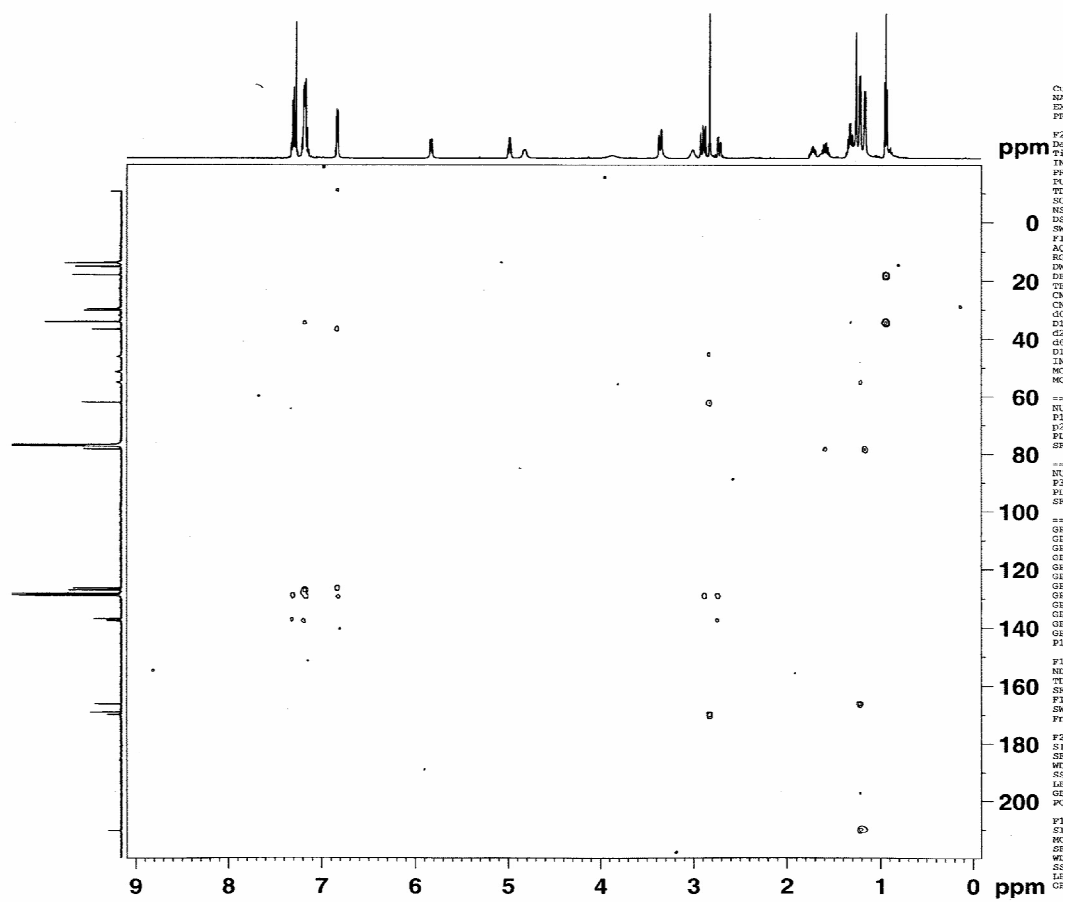

Supplement: NIHMS109217-supplement-3_si_003.pdf [file NIHMS109217-supplement-3_si_003.pdf]
